# Supplementary material for: Adult mouse cortical cell taxonomy revealed by single cell transcriptomics
Source: Springer Nature journal article supplement (doi:10.1038/nn.4216), 2016-01-04
Supplement: 41593_2016_BFnn4216_MOESM67_ESM.pdf [file 41593_2016_BFnn4216_MOESM67_ESM.pdf]

## Supplementary Information for

### Adult Mouse Cortical Cell Taxonomy Revealed by Single Cell Transcriptomics

Bosiljka Tasic<sup>1,2,3</sup>, Vilas Menon<sup>1,2</sup>, Thuc Nghi Nguyen<sup>1</sup>, Tae Kyung Kim<sup>1</sup>, Tim Jarsky<sup>1</sup>, Zizhen Yao<sup>1</sup>, Boaz Levi<sup>1</sup>, Lucas T. Gray<sup>1</sup>, Staci A. Sorensen<sup>1</sup>, Tim Dolbeare<sup>1</sup>, Darren Bertagnolli<sup>1</sup>, Jeff Goldy<sup>1</sup>, Nadiya Shapovalova<sup>1</sup>, Sheana Parry<sup>1</sup>, Changkyu Lee<sup>1</sup>, Kimberly Smith<sup>1</sup>, Amy Bernard<sup>1</sup>, Linda Madisen<sup>1</sup>, Susan M. Sunkin<sup>1</sup>, Michael Hawrylycz<sup>1</sup>, Christof Koch<sup>1</sup>, Hongkui Zeng<sup>1</sup>

<sup>1</sup> Allen Institute for Brain Science, Seattle, WA, USA.

<sup>2</sup> These authors contributed equally to this work.

<sup>3</sup> Correspondence to: Bosiljka Tasic ([bosiljkat@alleninstitute.org](mailto:bosiljkat@alleninstitute.org)).

The following Supplementary Tables are included as Excel files:

**Supplementary Table 1. Transgenic driver lines.**

**Supplementary Table 2. Transgenic reporter lines.**

**Supplementary Table 3. Single cell samples.**

**Supplementary Table 4. Cre line and cell type relationships.** The percentage of cell types detected in each Cre line/dissection combination separated by core and intermediate cells. These data were used to generate the graphical representation in **Fig. 2b**.

**Supplementary Table 5. Evaluation of enrichment of interneuron types in upper or lower cortical layers using the hypergeometric test.** For details on statistics methodology see **Methods**. Note that lack of statistically significant enrichment does not necessarily indicate that there is no enrichment, as our sampling did not allow comprehensive evaluation of spatial enrichment for all types. We do not claim lower layer-enrichment for the Pvalb-Wt1 type because we obtained statistical significance only in one of the two examined recombinase lines. Additional information on spatial enrichment for some of these types can be obtained by examination of cell-type-specific markers by RNA ISH.

**Supplementary Table 6. Marker genes for transcriptomic cell types.** The table also contains an earlier version of the cell type nomenclature used in the original release of the online scientific vignette.

**Supplementary Table 7. Transcriptomic cell types: correspondence to literature.**

**Supplementary Table 8. Differentially processed exons among cell types.**

**Supplementary Table 9. Evaluation of correspondence between RNA-seq and Allen Brain Atlas chromogenic RNA ISH data.** Out of 228 genes examined, 72% show agreement between single cell RNA-seq and Allen Brain Atlas data. For most of the other genes, the disagreement is due to the absence of signal in the Allen Brain Atlas ISH (17%). Small numbers of genes display apparently ubiquitous signal in VISp by ISH (2%), specificity of the signal that is difficult to interpret (2%), or the ISH pattern that, in fact, disagrees with RNA-seq (2%). For about 4% of the genes, no data is available in the Allen Brain Atlas.

**Supplementary Table 10. Cluster identities after subsampling of single cell RNA-seq data.** Cluster identities obtained using the full depth sequencing data (median of ~4.4 million mapped reads or ~8.7 million total reads) are compared to cluster identities obtained when data from each cell were subsampled to 100,000 and 1,000,000 mapped reads per cell. We detect fewer clusters with decreased sequencing depth.

**Supplementary Table 11. Genetic background estimate for all animals used in the study.** In our experimental animals, the percent of C57BL/6J genetic background ranges from 75% to



100% with the average of ~96%. In cases where the original ancestor we obtained was on mixed background, we adopted a conservative estimate of 0% C57BL/6J in that ancestor.

**Supplementary Table 12. Consequences of cluster validation parameter change on single cell classification.** Cluster identity assignment for each cell is listed for our default parameters (20 genes,  $p < 0.01$ ), and after changes in these parameters: decrease or increase in the number of genes to 10, and 50, respectively, and change in the  $p$  value to  $p < 0.05$ . With parameter change, on average, ~3% of the cells change cluster identity (from one core to another core, from one core to intermediate connecting two different cores, or from intermediate connecting two cores to an intermediate connecting two different cores or becoming a third core), while ~18% change from core to intermediate and vice versa (but stay within same core/intermediate identity combination). However, the total number of core clusters is preserved for all parameter changes.

**Supplementary Table 13. Probes for DFISH.**

**Supplementary Table 14. Quantitative RT-PCR assays.**

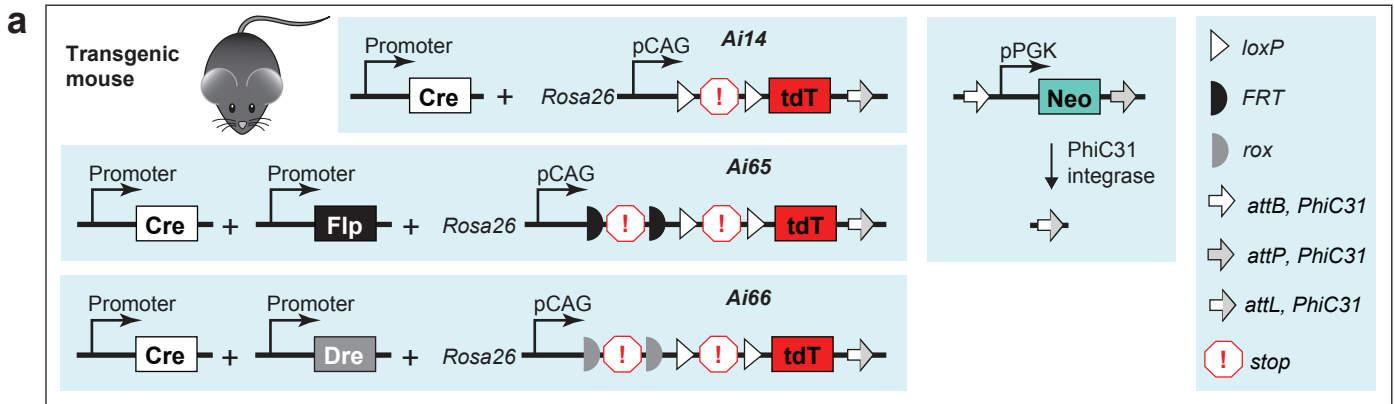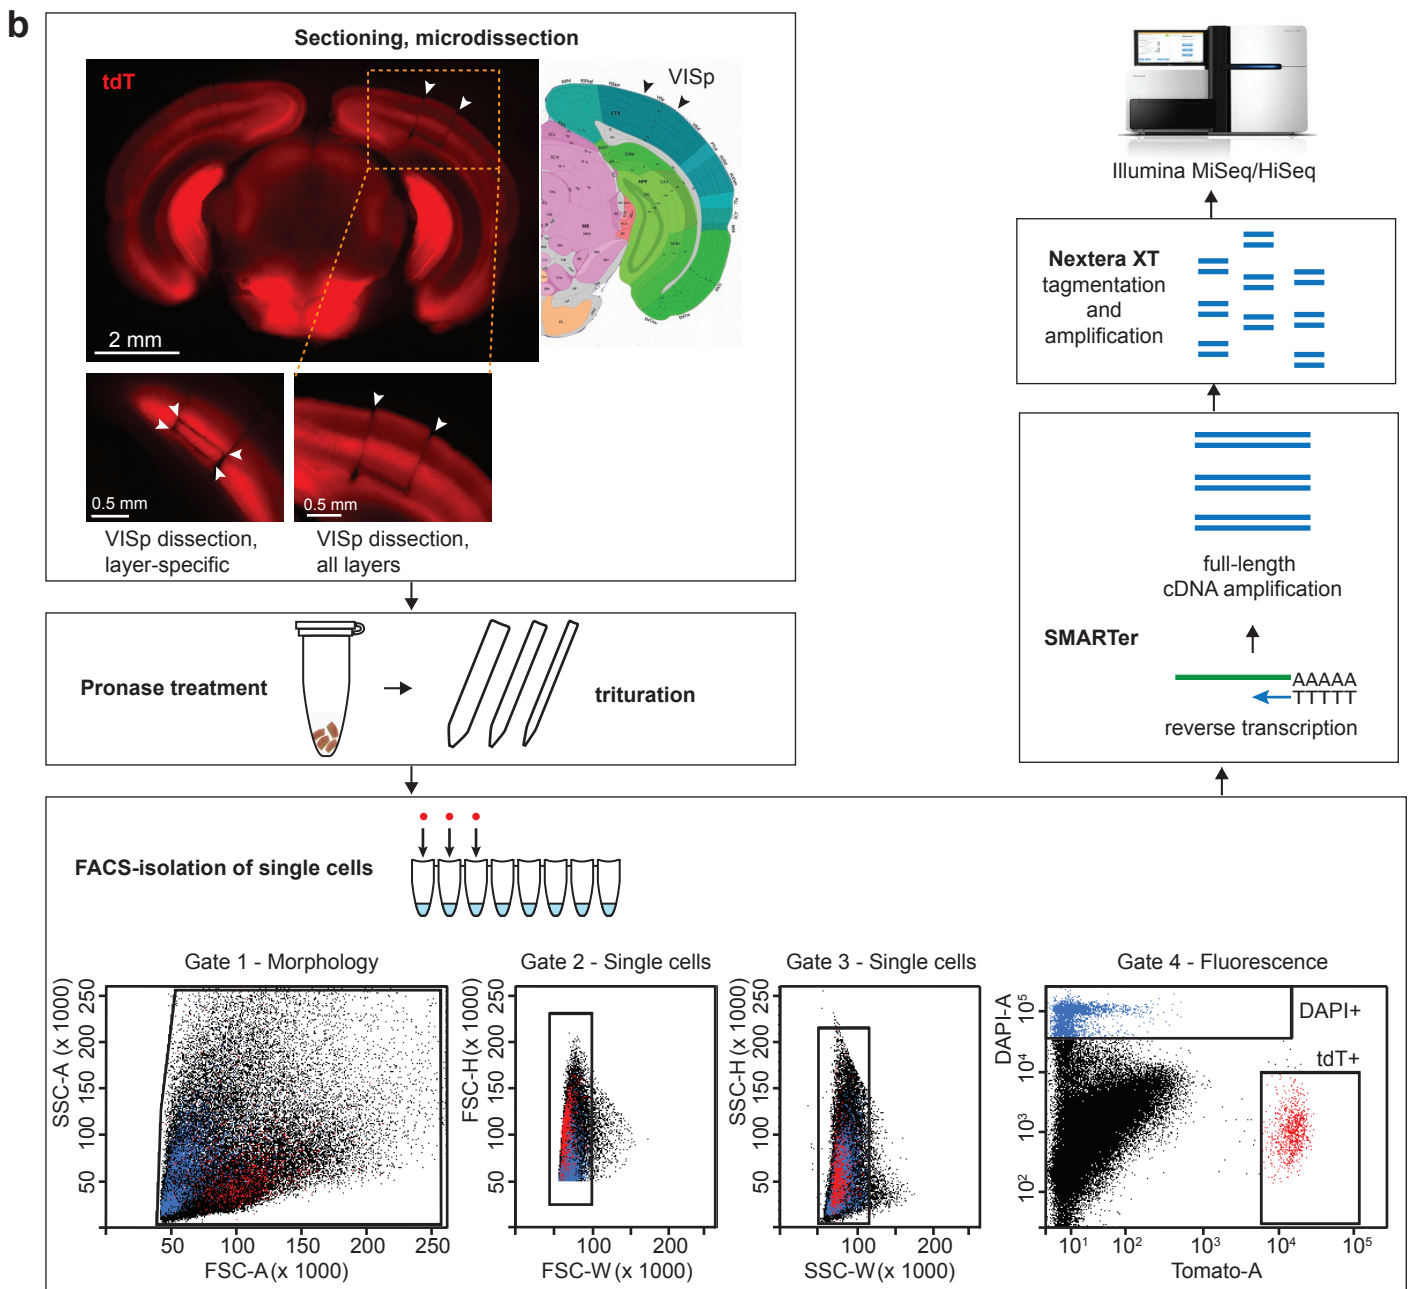

**Supplementary Figure 1. Detailed experimental workflow.** (a) Schematic representation of transgenes used for the lines mentioned in this paper; polyadenylation sites in transgenes are omitted for clarity. Each Cre recombinase line was crossed to *Ail4* or to a second recombinase line (*Flp* or *Dre*) and then to an appropriate reporter (*Ai65* or *Ai66*, see **Supplementary Table 2**). We used *Ai65* with or without the *Neo* gene present (it can be excised by a cross to a *PhiC31o* integrase line)<sup>51</sup>. (b) Detailed experimental workflow. Starting with an adult male transgenic mouse, age P56 ± 3, fresh brain was isolated, sectioned and microdissected. The microdissection was performed to isolate tissue within VISp that spans the whole cortical depth or was focused on one or several contiguous layers of VISp. The microdissected tissue was treated with protease and triturated with pipettes with increasingly smaller tip diameter (600 μm, 300 μm, and 150 μm). We isolated single cells from the cell suspension by FACS. We applied the presented set of gates and “single cell sorting mode,” which excludes any cell-containing droplets if adjacent droplets also contain any cells or debris. Gate 1 was applied to exclude debris, while gates 2 and 3 exclude cell doublets. Gate 4 was used to select cells with high tdT fluorescence and low DAPI fluorescence. Single cell mRNA was reverse transcribed, amplified into cDNA (SMARTer, Clontech), and tagged using Nextera XT (Illumina). Single cell libraries were sequenced on Illumina HiSeq and/or MiSeq.

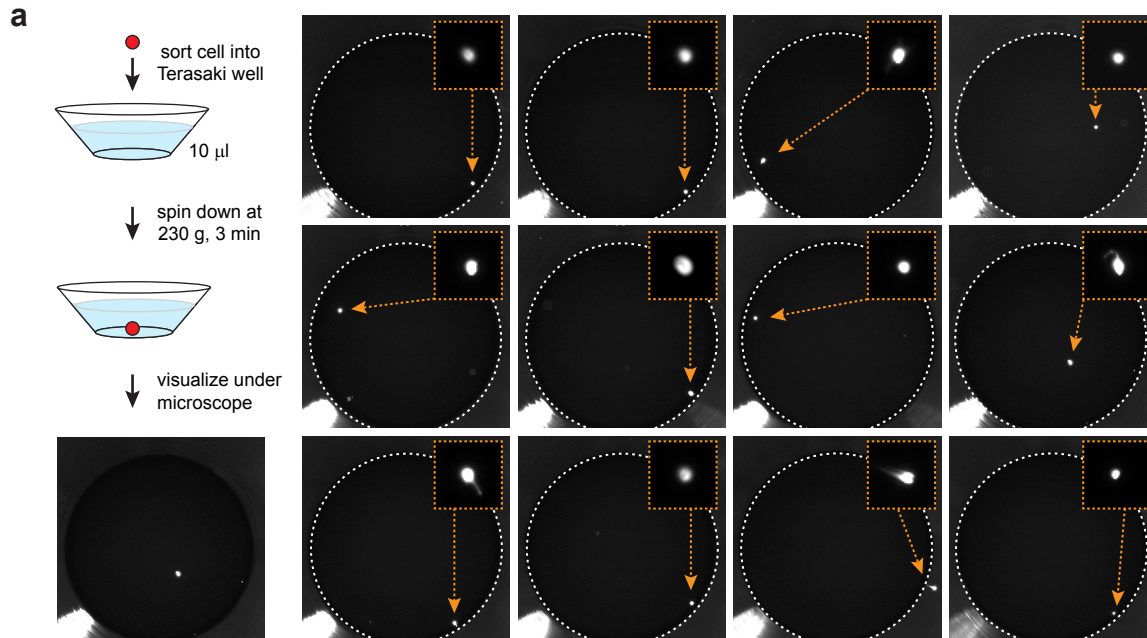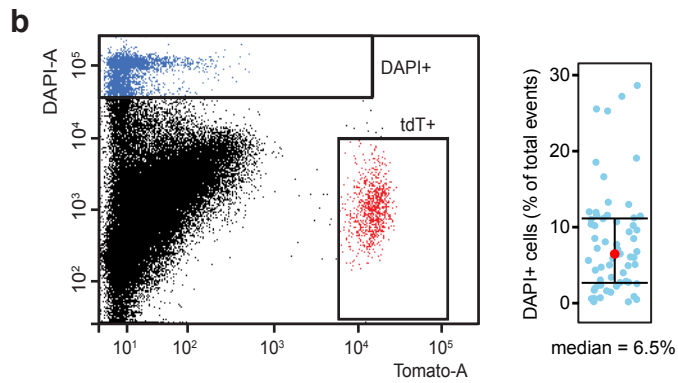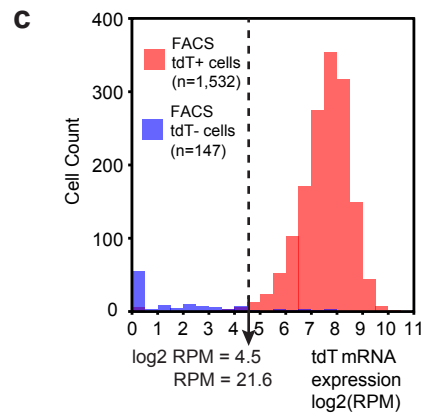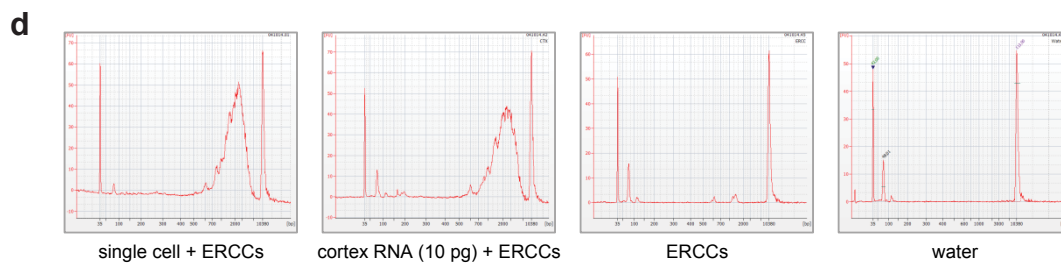

**Supplementary Figure 2. Experimental QC.** (a) A representative control experiment for assessing FACS specificity and efficiency. Before sorting cells into 8-well strips or 96-well plates for transcriptional profiling, the cells were sorted using the same setup into Terasaki plates containing 5 or 10  $\mu$ l of artificial cerebrospinal fluid (ACSF). Terasaki wells were examined for presence of a single cell, more than one cell, or absence of a cell. In total, we scored 425 wells over 39 experiments, with 6-12 wells per experiment, and found that on average  $96 \pm 6\%$  (standard deviation) wells contained one cell. No wells were found to contain two or more cells. (b) Assessing the percentage of dead cells in a sample of dissociated single cells by FACS. Left: A representative FACS plot for sorting  $tdT^+$  cells, and assessing the percentage of DAPI-positive cells in the sample. Right: Average percentage of cells within the DAPI-positive gate for 64 out of 72 FACS experiments performed in this study. Red dot represents the median, whiskers represent the 25<sup>th</sup> and 75<sup>th</sup> percentiles. (c) The distribution of *tdT* mRNA expression in single cells as measured by RNA-seq in  $tdT^+$  (red) and  $tdT^-$  (blue) cells, for all classified neurons. More than 99% of cells sorted as  $tdT^+$  show higher expression of *tdT* mRNA than all classified neurons sorted as  $tdT^-$ . (d) Representative electrophoretograms obtained by Bioanalyzer (Agilent) for 53 batches of cDNA amplifications showing amplified cDNA from a single cell and standard positive (cortex RNA) and negative (ERCCs and water) controls.

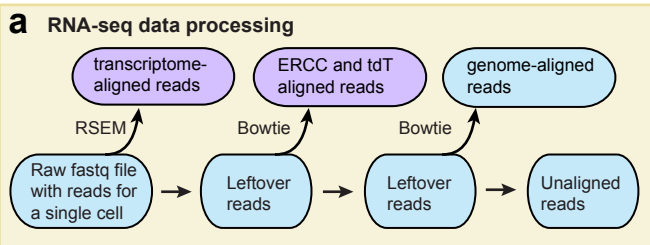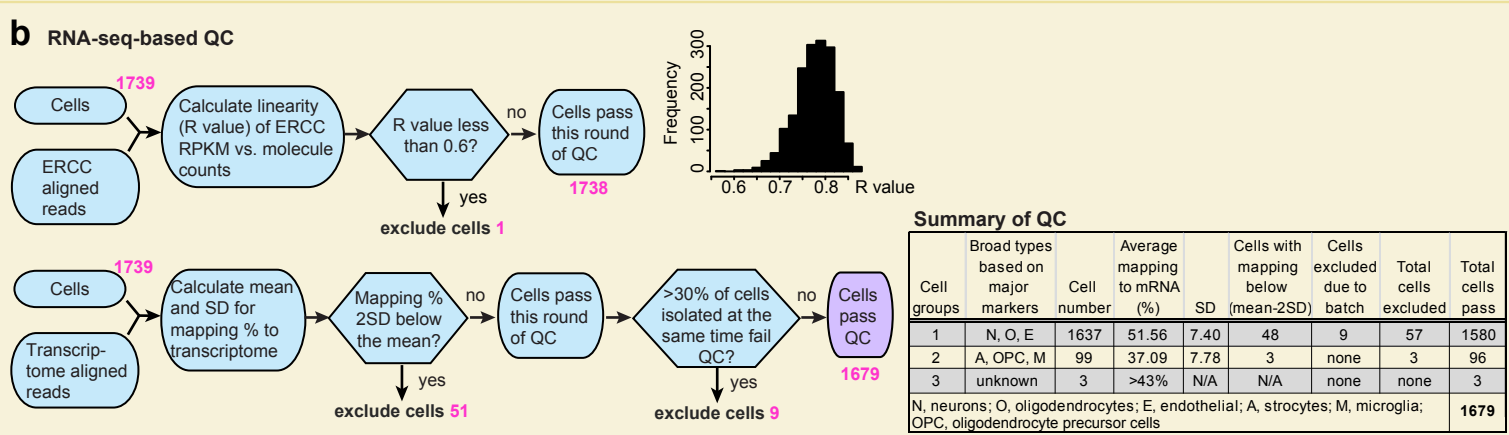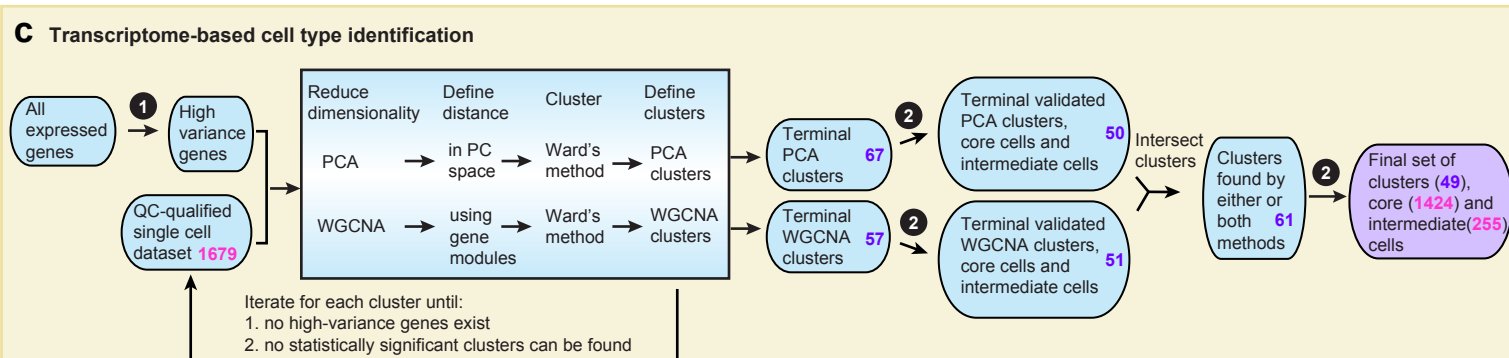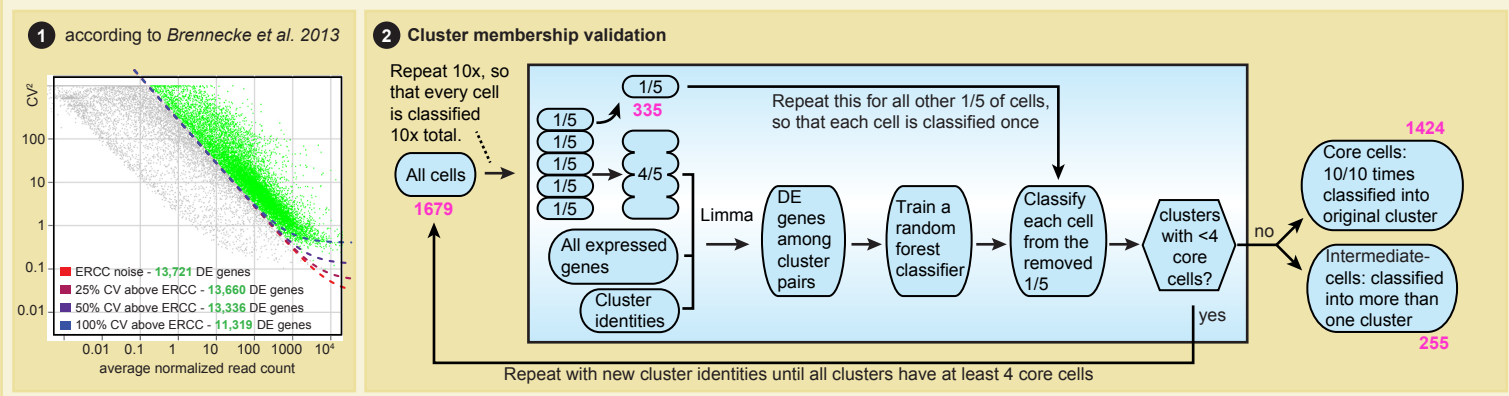

**Supplementary Figure 3. Detailed data analysis workflow.** (a) Workflow diagram for processing of raw sequencing reads to generate counts and RPKM values for genes, as well as total read counts aligning to *ERCC* RNAs, *tdT* mRNA, and genomic regions. (b) Quality control steps based on *ERCC* detection linearity and transcriptome mapping percentage, including the number of cells that were excluded at each stage. The single cell that was excluded based on low *ERCC* linearity was also excluded based on low transcriptome mapping percentage. (c) Details of the iterative cell type identification workflow, starting with the identification of high variance genes (shown as green dots in inset 1), and proceeding through the repeated use of the validation procedure (explained in detail in inset 2) that tests cluster membership to identify core cells and intermediate cells. The latter procedure also results in reintegration of small clusters that contain less than 4 cells. Numbers in pink indicate the number of cells used at each point in the analysis; numbers in purple represent the numbers of clusters.



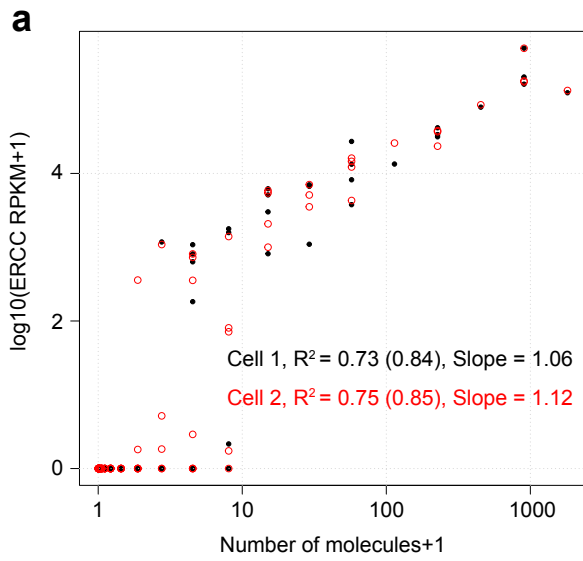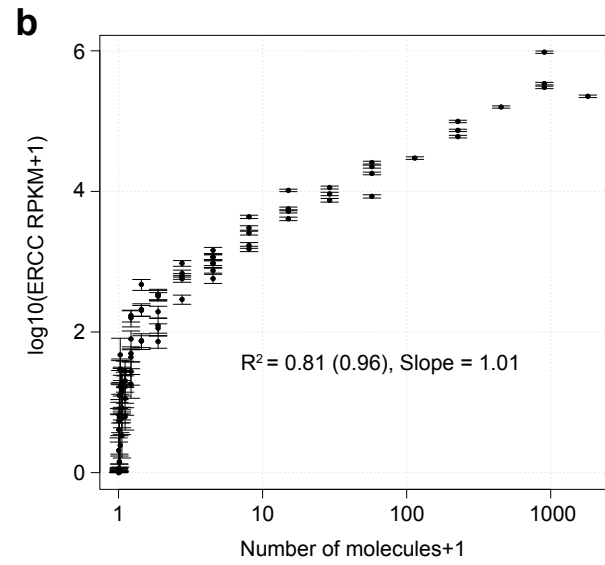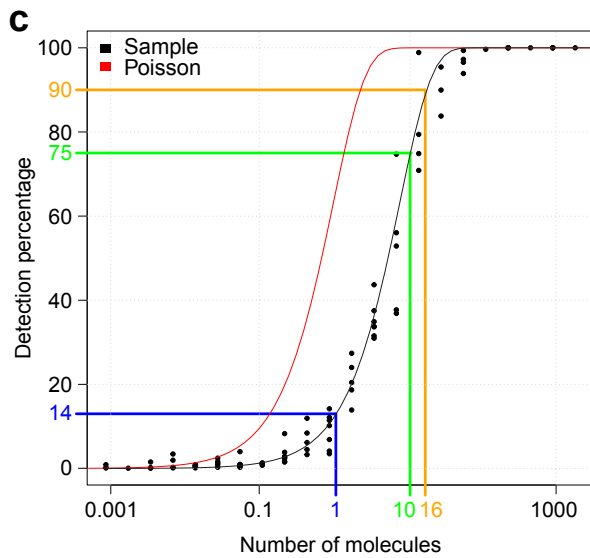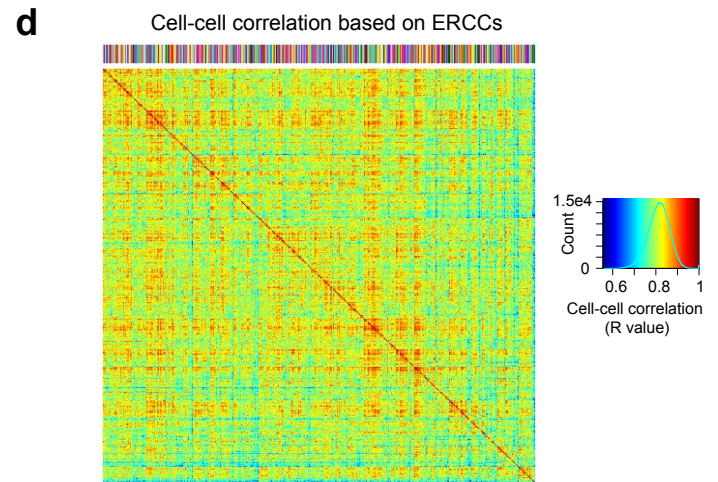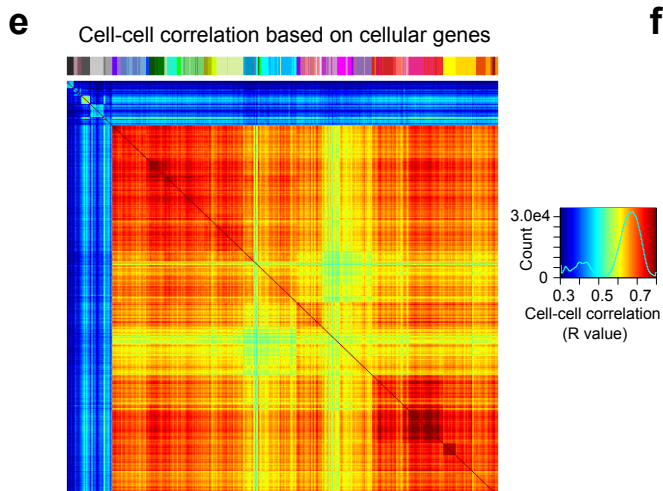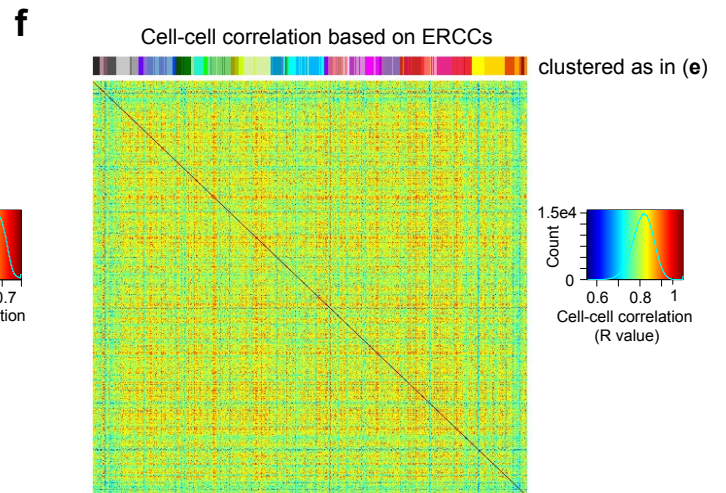



**Supplementary Figure 4. QC based on spike-in *ERCC* RNAs.** (a) Plots of *ERCC* RPKM values (where the RPKM values were calculated with respect to total reads mapped to *ERCC* RNAs only,  $N = 92$  species) versus putative number of molecules for two different cells shows good linearity as determined by  $R^2$  value (in parentheses,  $R^2$  value was calculated using only the 38 *ERCC* RNA species present at  $> 1$  molecule per sample) and slope close to 1. (b) Same as (a), but aggregated for all 1679 cells. Error bars represent SEM. (c) Percentage of times a given *ERCC* RNA species was detected (out of 1679 cells) versus putative molecule count. Red line shows the expected detection based on Poisson statistics of dilution. Blue and green lines indicate 1 and 10 molecules, respectively, while the orange line indicates 90% detection. Assuming that *ERCC* spike-ins follow Poisson statistics in dilution, an *ERCC* RNA species diluted down to one molecule per sample should be present in approximately 63% of the samples. In our samples, a single molecule of *ERCC* RNA, which is about 500-2000 nucleotides long, is detected ~14.7% of the time. This suggests that our method reliably detects ~23% of all molecules, given Poisson statistics. (d) Clustered heatmap showing Pearson's correlation  $R$  values based on *ERCC* RPKM values for each pairwise comparison between all 1679 cells. Color bar on top indicates final cluster identity. Cells do not group into clusters related to cell types based on their *ERCC* RPKM values. (e) Same as (d), but with cellular genes ( $N = 24,057$ ), showing block-like structures related to cell types, in contrast with the *ERCC*-only clustering shown in (d). (f) Same as (d), but with cells ordered as in (e), showing that there is no bias in *ERCC* RNA detection and quantification that is related to transcriptomic cell types.



**Supplementary Figure 5. Data QC.** (a) Mapping of transcriptomic data to mRNA (RefSeq mm10 assembly), genome, non-coding RNA (RNA NC) and *ERCC* RNAs for all 1679 single cells (left), 6 replicates of 10 pg total cortex RNA processed like the single cells (middle), and 3 replicates of 250 ng of unamplified cortex RNA prepared by TruSeq (right). The samples for unamplified cortex RNA were prepared from two *Rbp4-Cre;Ai14* mice and one *Trib2-2A-CreERT2;Snap25-LSL-2A-GFP* mouse. Red dots represent medians (values reported at the bottom), whiskers represent 25<sup>th</sup> and 75<sup>th</sup> percentiles. (b) Mapping statistics for individual cells that passed the QC arranged by the cell type as defined in **Fig. 1b**. Intermediate cells are labeled white and are positioned to the right of the cell type with which they are most strongly associated by random forest classification. (c) Mean mapping percentages of each category described in (a) for all 49 cell types based on 1424 core cells. (d) Percent of total reads mapping to mRNA for all 1424 core cells for all 49 cell types. Red dots represent medians (values reported at the bottom). Whiskers represent 25<sup>th</sup> and 75<sup>th</sup> percentiles.

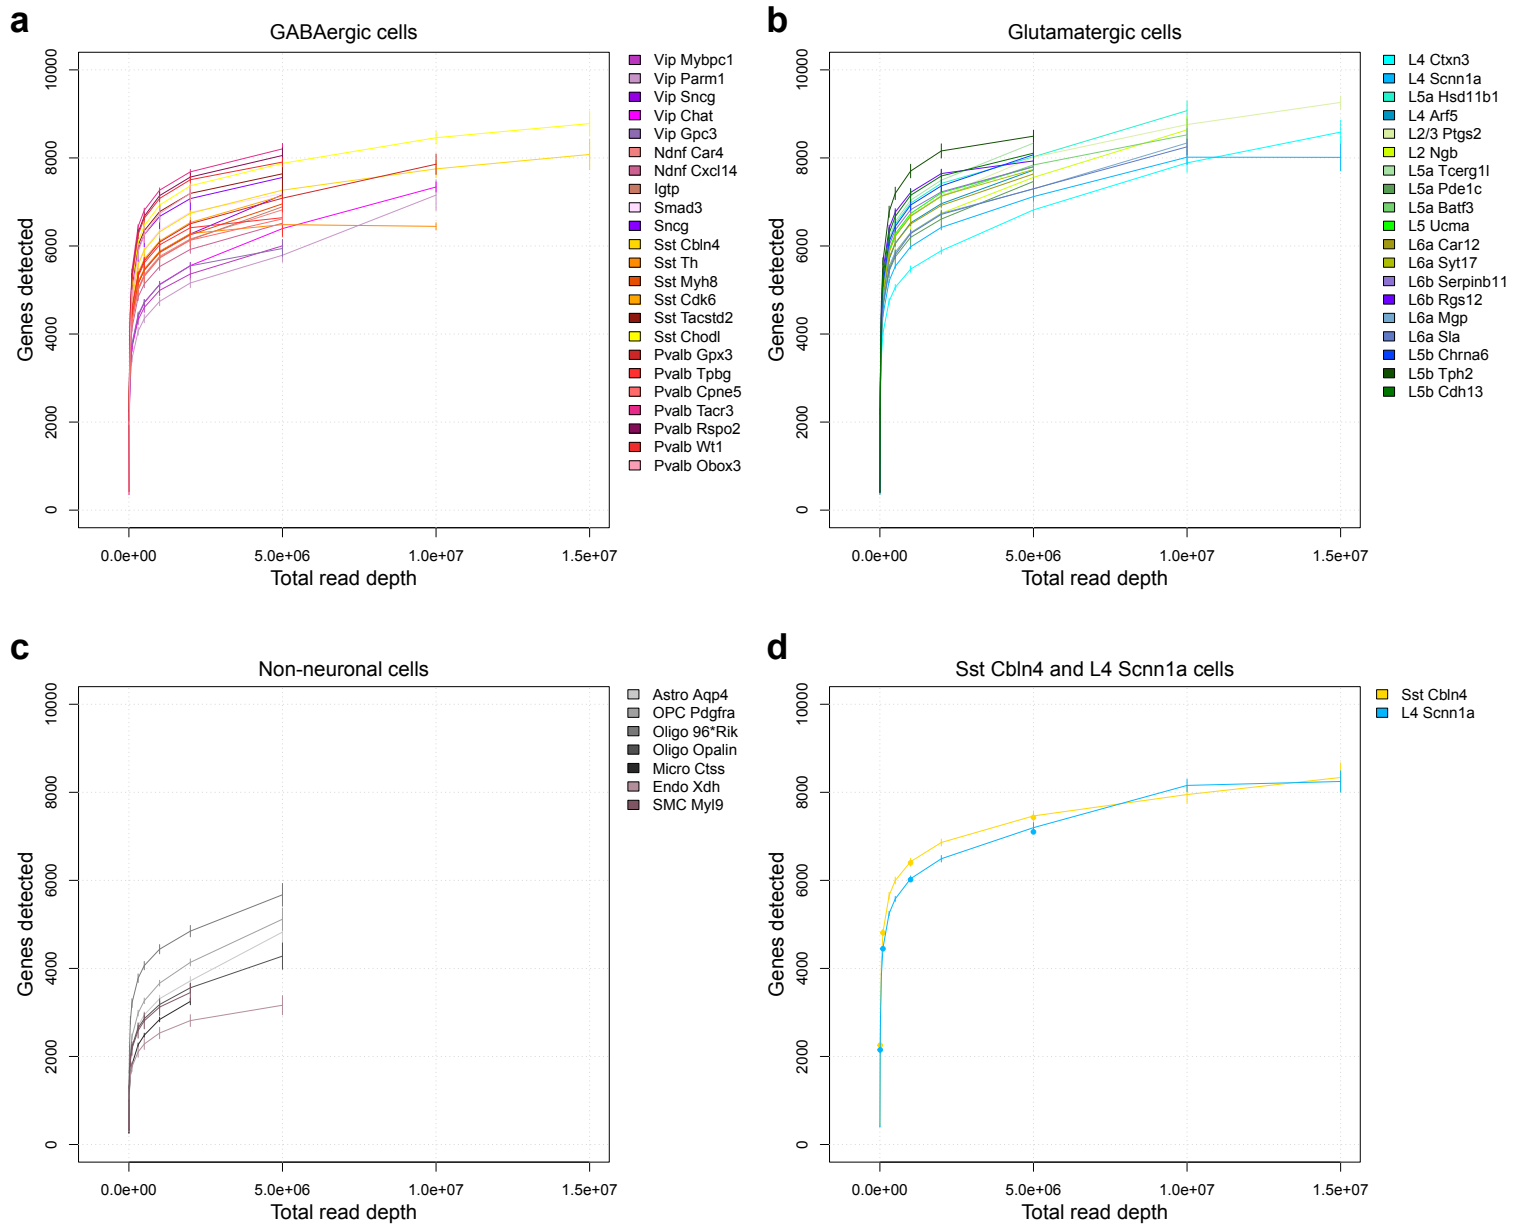

**Supplementary Figure 6. Gene detection and sequencing depth.** Plots showing the number of genes detected ( $\geq 1$  read) for each of the **(a)** GABAergic ( $N = 23$ ), **(b)** glutamatergic ( $N = 19$ ), and **(c)** non-neuronal ( $N = 7$ ) transcriptomic cell types as a function of post-alignment subsampling to a specified number of total reads. Each curve represents the mean number of genes detected over all the cells in that group, and error bars represent SEM. **(d)** Comparison of the number of genes detected ( $\geq 1$  read) for two representative cell types upon post-alignment subsampling (lines) or upon subsampling raw reads and rerunning the alignment (dots). The minor differences between the two approaches for subsampling on gene detection suggest that the computationally simpler post-alignment subsampling is a valid way to simulate subsampling of raw reads.

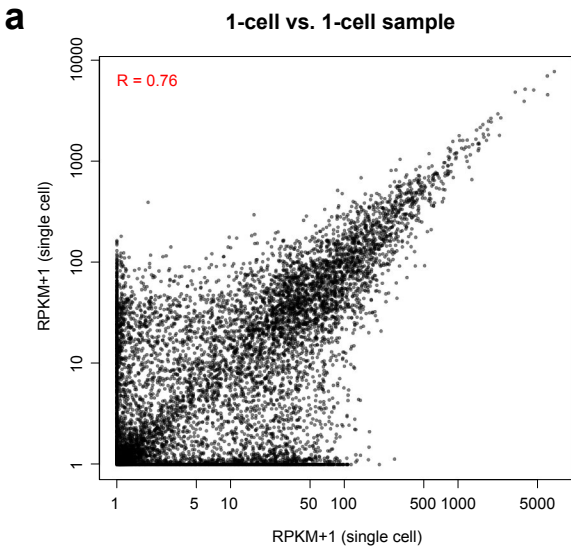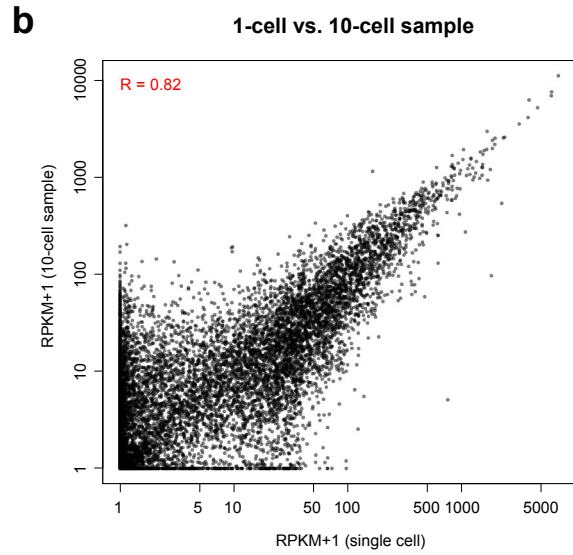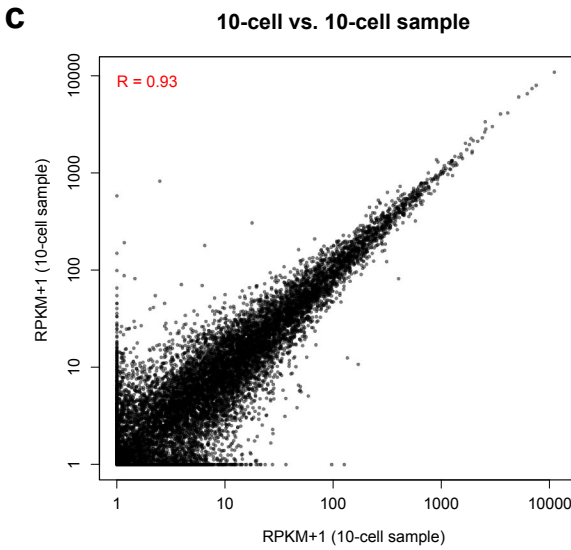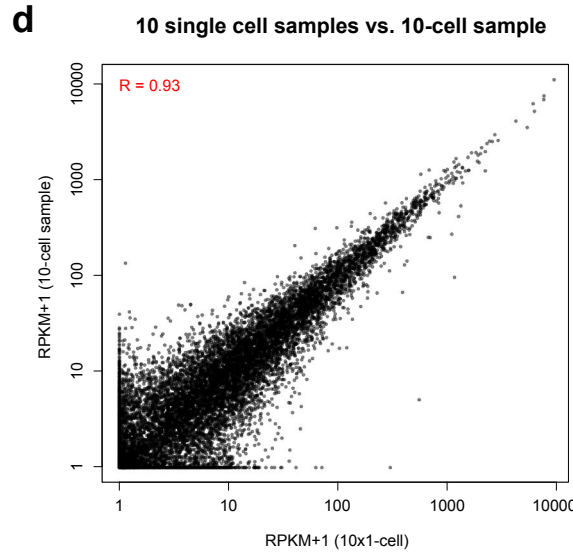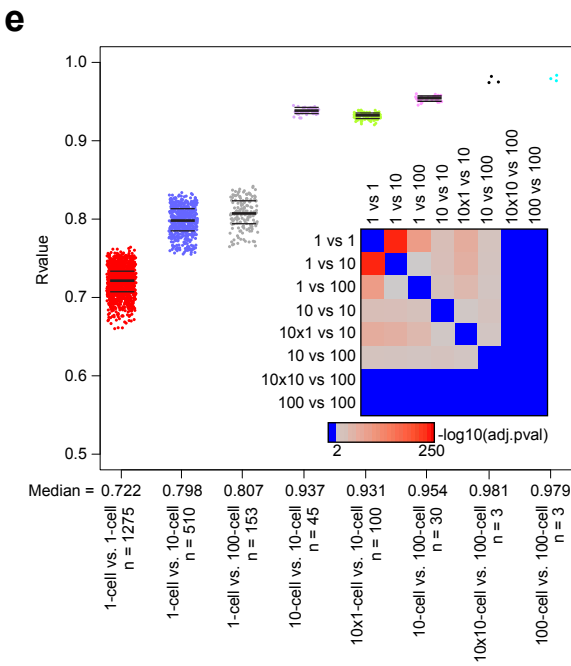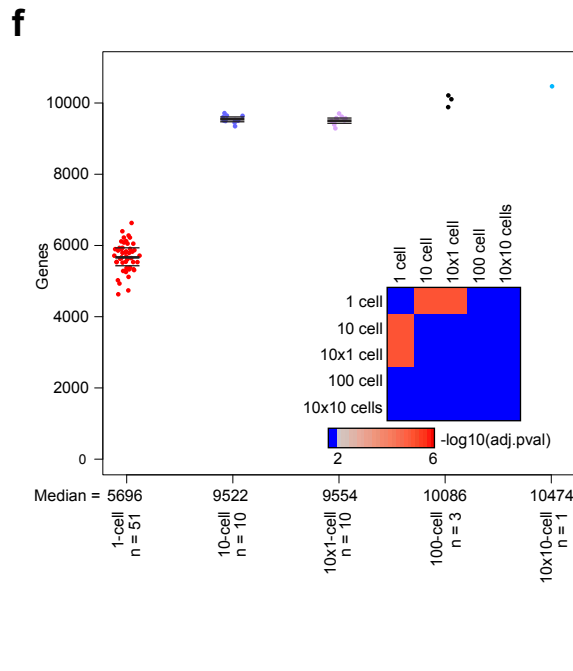

**Supplementary Figure 7. Gene detection in single cells and cell populations.** Comparison of RNA-seq data generated by the SMARTer/Nextera approach from individual *tdT<sup>+</sup>* cells and small populations of *tdT<sup>+</sup>* cells isolated from layer 6 of VISp in the *Ntsr1-Cre;Ai14* line. Examples of gene expression correlation between (a) two single cell samples, (b) one single cell sample and one 10-cell population, (c) two 10-cell populations, and (d) ten single cell samples pooled computationally and one 10-cell population. All samples were subsampled down to 5 million mapped reads, total number of genes for all comparisons is 24,057. (e) Distributions of Pearson's R values (on log-transformed data) for all pairwise comparisons between 77 single cell samples, ten 10-cell samples, three 100-cell samples, and ten computationally pooled single cell samples of 10 cells; n indicates the number of such pairwise comparisons in each group. Statistical significance between distributions of R values was evaluated by Mann-Whitney test with Bonferroni correction and is represented as a heatmap at the bottom-right corner of the panel. The medians for Pearson's R values for the "10-cell vs. 10-cell" and "10×1 cell vs. 10-cell" comparisons, while statistically significantly different, are less than 0.01 apart (0.937 and 0.931, respectively), indicating that computational pooling of the data from 10 individual cells provides essentially the same information as profiling 10 cells together in an experimental batch. Black bars represent medians, whiskers represent 25<sup>th</sup> and 75<sup>th</sup> percentiles. (f) Genes detected (RPKM  $\geq$ 1) in a single cell samples, 10-cell samples, 100-cell samples, computationally pooled ten single cells, and computationally pooled ten 10-cell samples. The difference in gene detection between single cells and 10-cell samples is eliminated when ten single cells are pooled computationally, suggesting the lower gene detection in single cell samples is due to biological variation rather than technical issues due to limited sensitivity of the employed method. Computationally pooled samples are labeled as: 10×1, ten single-cell samples pooled together; 10×10, ten samples derived from 10-cell populations pooled together. Black bars represent medians, whiskers represent 25<sup>th</sup> and 75<sup>th</sup> percentiles.

IPCA Clustering

Final Clusters

IWGCNA Clustering

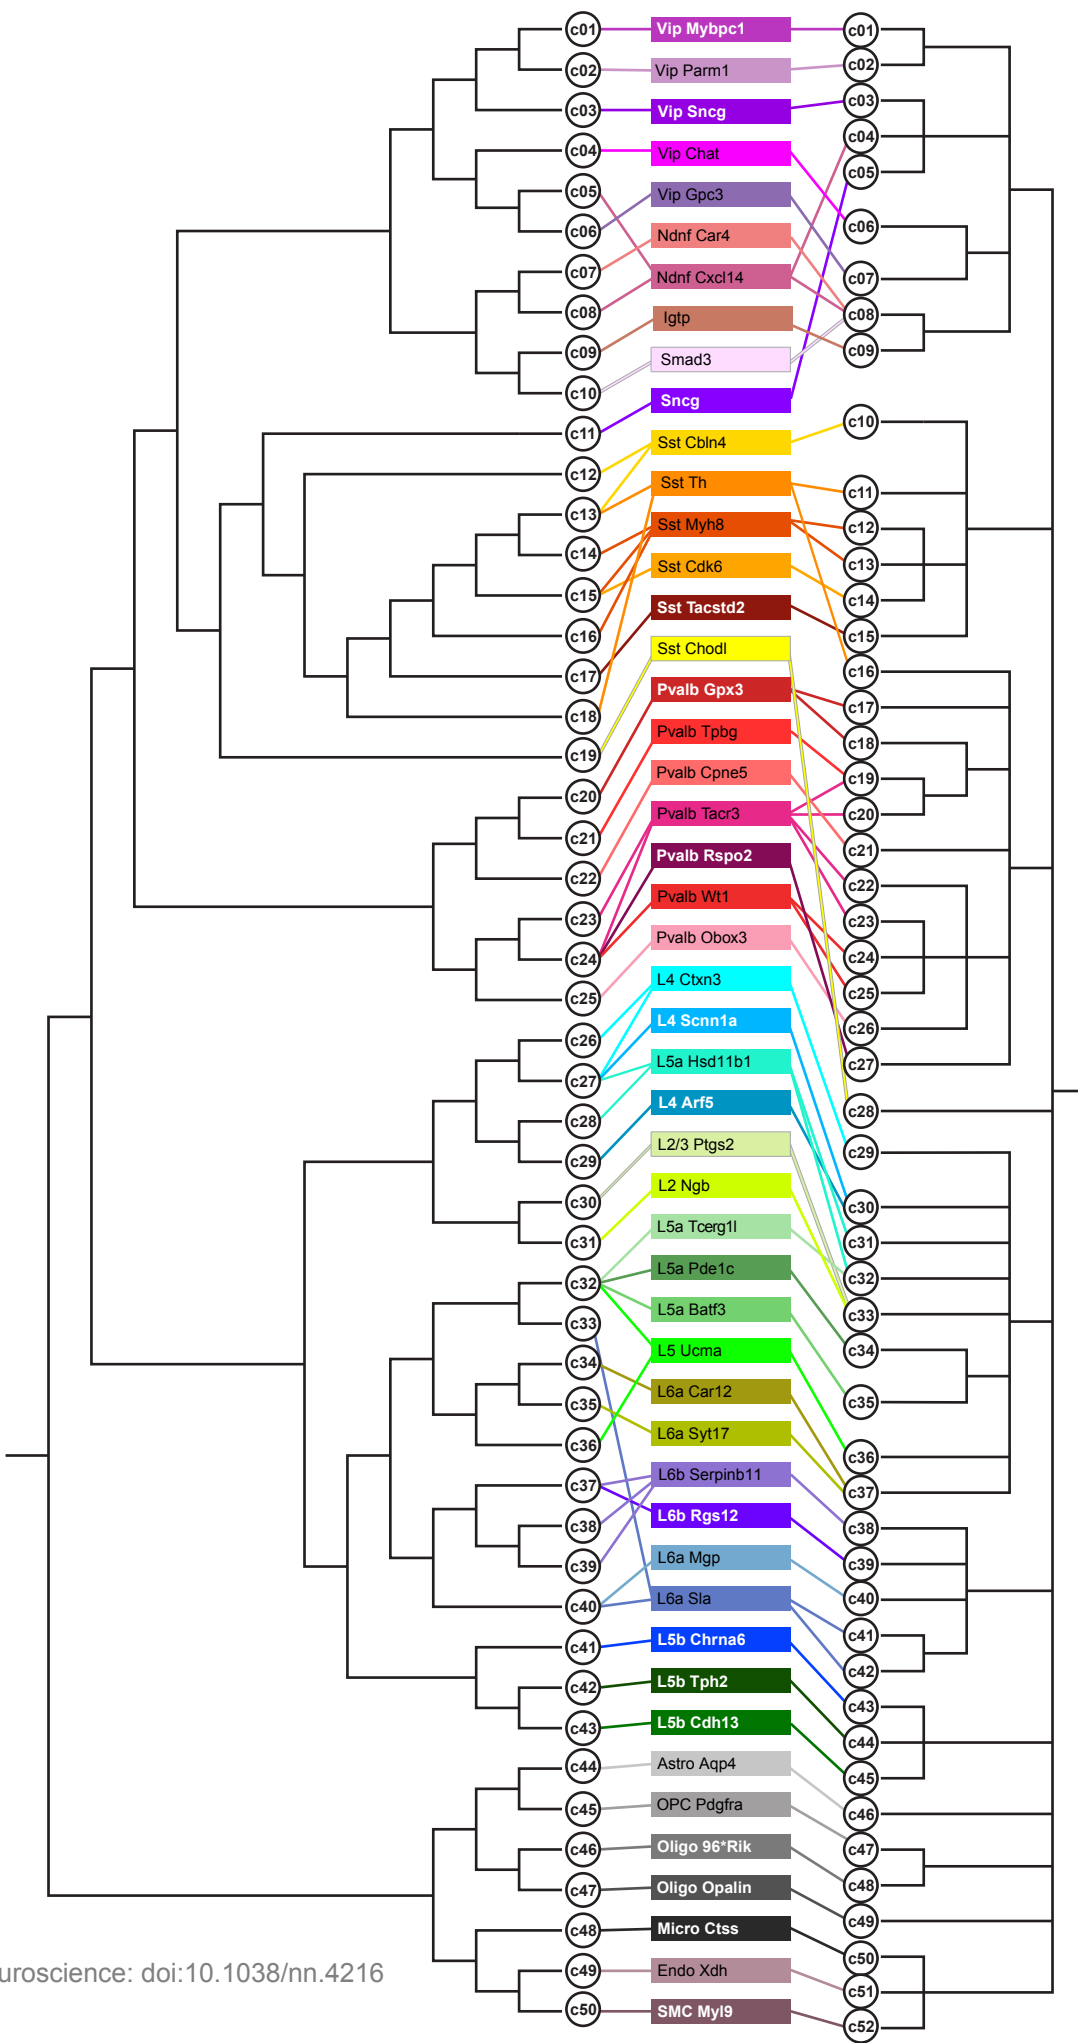



**Supplementary Figure 8. Cluster intersection for iterative PCA and iterative WGCNA.** Schematic showing the iterative splits leading to the final set of PCA-based clusters (left) and WGCNA-based clusters (right), and their subsequent intersection to generate the final set of clusters described in the paper. For iterative PCA, every split is binary, whereas for WGCNA, the number of clusters at each iteration was determined as described in the **Methods**.

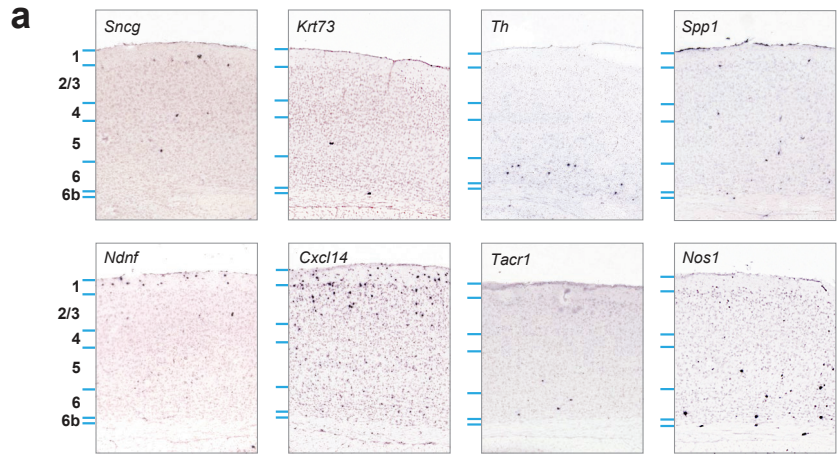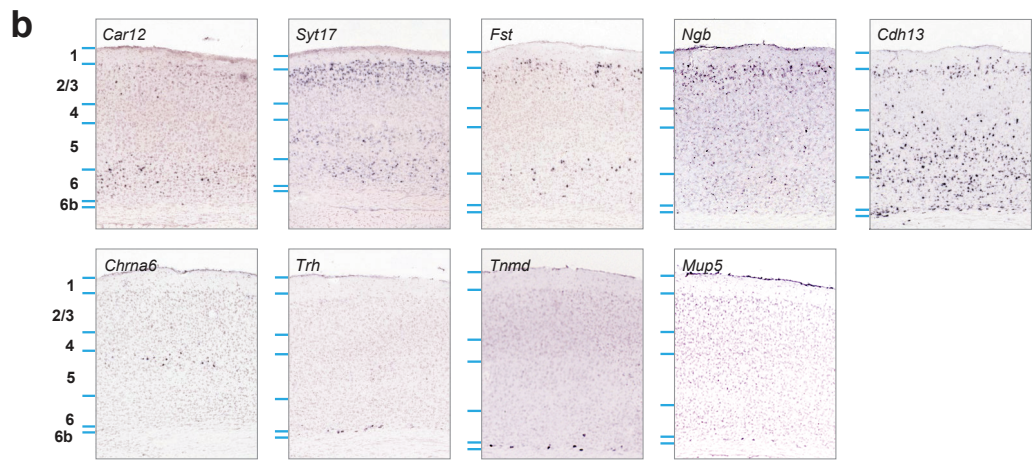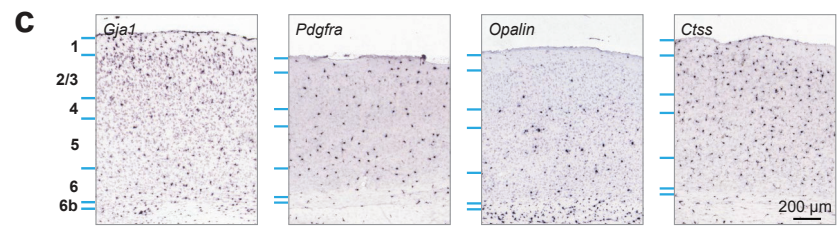

**Supplementary Figure 9. Chromogenic RNA *in situ* hybridization confirms select gene expression and confirms/refines spatial positioning of cell types.** Images were obtained from the Allen Brain Atlas<sup>1</sup>. Each focuses on VISp, and is part of at least two brain-wide experiments, except for a single experiment for *Opalin*. Scale bar in the *Ctss* panel applies to all. Select genes are shown for (a) GABAergic, (b) glutamatergic and (c) non-neuronal cell types. (a) *Sncg* mRNA labels cells very sparsely distributed throughout VISp – this agrees with low-abundant Vip-Sncg and Sncg types defined by RNA-seq. As the Vip-Sncg type is enriched in upper layers (Supplementary Table 5), the lower layer *Scng*<sup>+</sup> cells likely belong to the Sncg type. *Krt73* is expressed in a very rare set of cells mostly in lower layers of VISp. As *Krt73* is shown by RNA-seq to be present in a subset of cells of the Sncg type, the *Krt73* ISH agrees with the enrichment of the Sncg type in lower layers of VISp. *Th* mRNA labels cells enriched in lower layers in agreement with its unique expression in the Sst-Th and Pvalb-Gpx3 types, which are predominantly located in lower cortical layers (Fig. 2b, Supplementary Table 5). *Spp1* is expressed in a small set of cells dispersed throughout VISp. This agrees with RNA-seq, as only subsets of cells within the Sst-Th and SMC-Myl9 types express this marker. The cells along the pia may belong to the SMC-Myl9 type. *Ndnf* (*A930038C07Rik*) mRNA is expressed strongly in L1 in agreement with its RNA-seq expression in *Ndnf* types, which are enriched in upper layers (Supplementary Table 5). *Cxcl14* mRNA is expressed mostly in upper-layers in agreement with its RNA-seq-based expression in *Ndnf* and Vip types that are enriched in upper layers (Supplementary Table 5). *Cxcl14* mRNA is also expressed in small cell bodies throughout VISp – those, in agreement with RNA-seq data, likely represent astrocytes. *Tacr1* mRNA sparsely labels cells mostly confined to L5 and 6, and since the majority of *Tacr1*<sup>+</sup> cells belong to Sst-Chodl type, this suggests Sst-Chodl cells are enriched in L5/6. In agreement with this, *Nos1* mRNA strongly labels cells enriched in lower layers and based on RNA-seq is strongly expressed in the Sst-Chodl type. Therefore, the Sst-Chodl type is likely enriched in lower layers, based *Tacr1* and *Nos1* ISH. (b) In agreement with RNA-seq data, mRNAs for *Car12*, *Syt17*, *Fst*, and *Ngb* are expressed in subsets of L6 cells. These likely correspond to L6a-Car12 type (labeled by *Car12*), and L6a-Syt17 type (labeled by *Syt17*, *Fst*, and *Ngb*). *Syt17* is also expressed in L2/3 corresponding to L2-Ngb and L2/3-Ptgs2 types, and sparsely in L5, corresponding to L5a-Syt17, and L5b-Tph types. *Fst*, *Ngb* and *Cdh13* are expressed in superficial L2/3 cells, corresponding to the L2-Ngb type. *Chrna6* is expressed in a very small subset of L5 cells, corresponding to the L5b-Chrna6 type. *Trh*, *Tnmd* and *Mup5* are expressed in subsets of L6b cells. (c) Expression of several non-neuronal markers showing typical non-neuronal labeling: *Gjal1*, astrocytes; *Pdgfra*, OPCs; *Opalin*, oligodendrocytes (note white matter-enrichment below L6b); *Ctss*, microglia. Mean RNA-seq expression for each gene in this figure within each transcriptomic cell type is shown in Supplementary Fig. 12. To examine gene expression determined by RNA-seq in individual cells within any of the types, refer to the online visualization tool via the Allen Brain Atlas data portal (<http://casestudies.brain-map.org/celltax>).

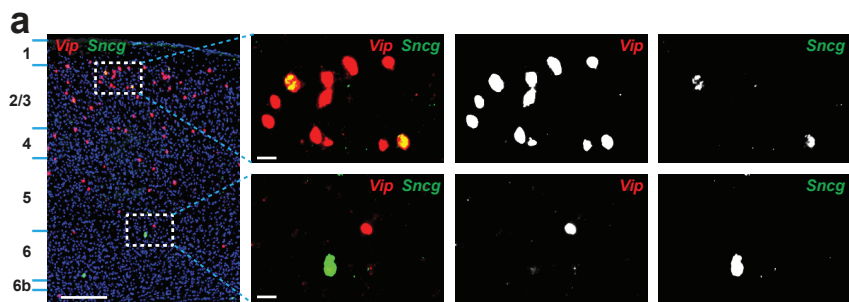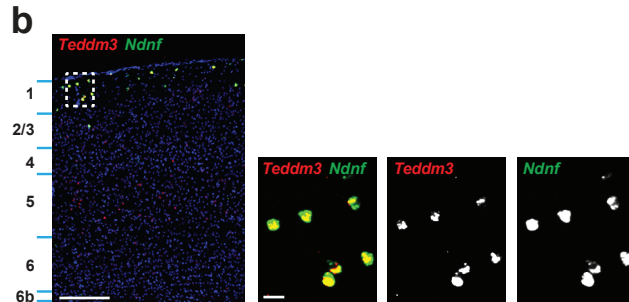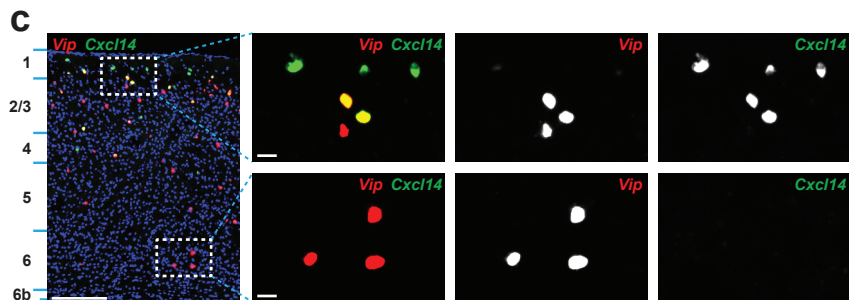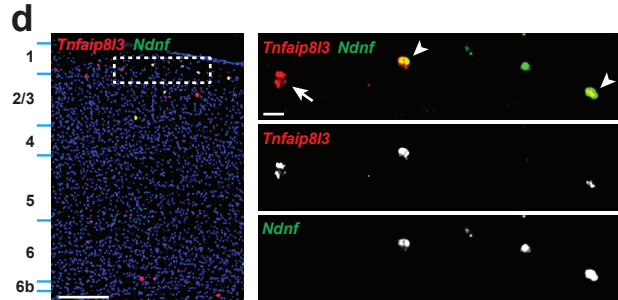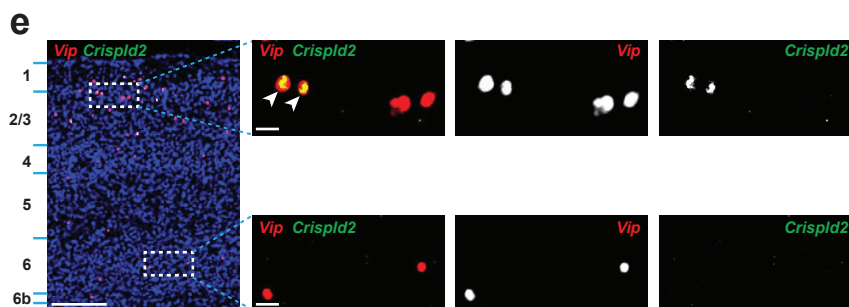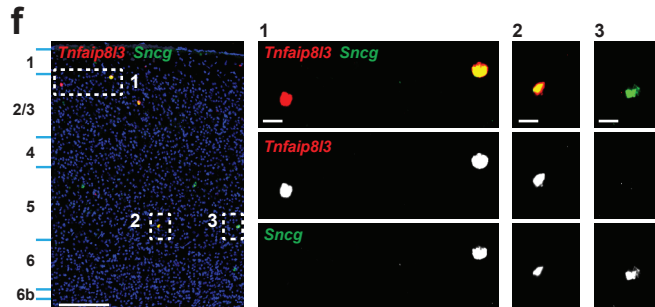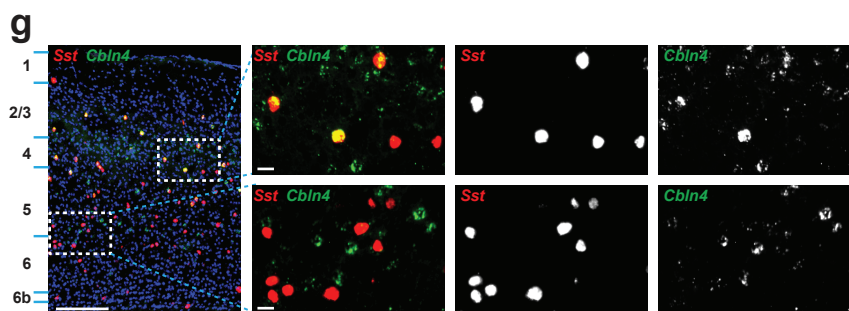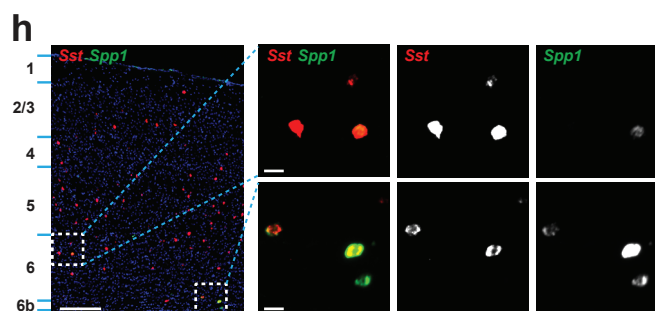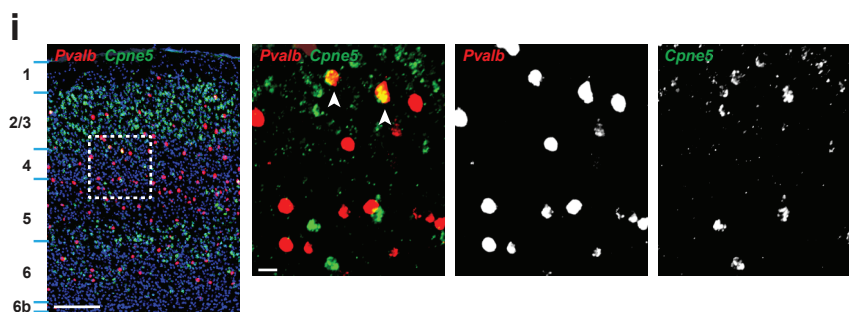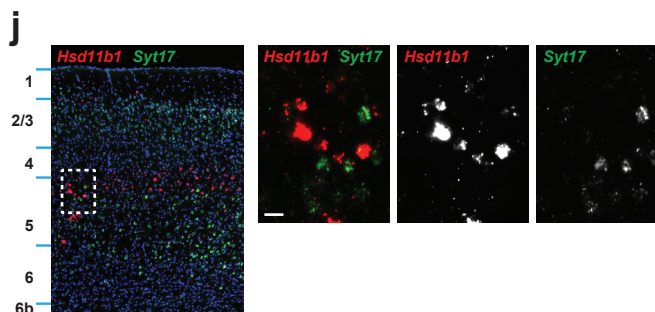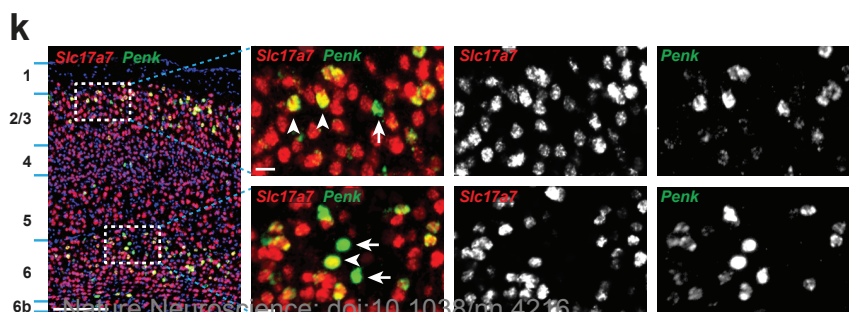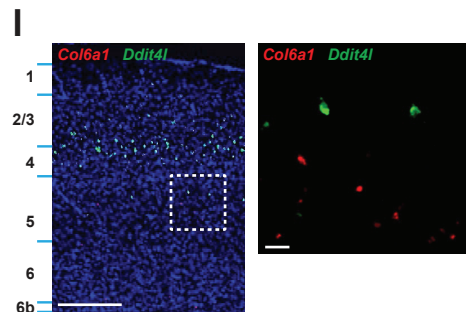

**Supplementary Figure 10. Double-label fluorescence RNA *in situ* hybridization (DFISH) confirms coexpression, mutually exclusive expression, and spatially restricted expression of select genes.** (a) *Sncg* mRNA is expressed sparsely in VISp: in a subset of *Vip*<sup>+</sup> cells in upper layers, and independently from *Vip* in lower layers, likely corresponding to *Vip*-*Sncg* and *Sncg* types, respectively. (b) *Teddm3* (*2310042E22Rik*) and *Ndnf* (*A930038C07Rik*) are co-localized in L1, corresponding to cells from *Ndnf* and *Smad3* types. *Teddm3* also labels cells in L5, likely corresponding to L5b-*Tph2* and L5b-*Cdh13* types. (c) *Cxcl14* mRNA is expressed in a subset of *Vip*<sup>+</sup> cells only in upper cortical layers that most likely correspond to the *Vip*-*Parm1*, *Vip*-*Mybpc1*, and *Vip*-*Sncg* cell types. In lower layers, *Vip*<sup>+</sup> cells, do not express *Cxcl14*, likely corresponding to the *Vip*-*Gpc3* type. (d) *Tnfaip8l3* and *Ndnf* are coexpressed in upper layers and likely correspond to the *Ndnf* types (arrowheads). *Tnfaip8l3*<sup>+</sup>/*Ndnf*<sup>-</sup> neurons (arrow) are also present, and most likely represent the *Vip*-*Sncg*, *Sncg*, and *Igtp* types. (e) *Crispld2* mRNA is expressed only in *Vip*<sup>+</sup> cells enriched in upper cortical layers (arrowheads) that most likely correspond to the *Vip*-*Mybpc1* type. In lower layers, *Crispld2* is not coexpressed with *Vip*. (f) *Tnfaip8l3* and *Sncg* are coexpressed in cells that most likely correspond to the *Vip*-*Sncg* and *Sncg* types. (g) *Sst* and *Cbln4* mRNAs are coexpressed in a subset of *Sst*<sup>+</sup> cells in upper layers only, likely corresponding to the *Sst*-*Cbln4* type. In lower layers, *Sst* and *Cbln4* are mutually exclusive. *Cbln4* is also expressed in many glutamatergic cell types. (h) *Spp1* is expressed in a subset of *Sst*<sup>+</sup> cells, likely corresponding to the *Sst*-*Th* type. (i) Coexpression of *Pvalb* and *Cpne5* mRNAs in rare upper-layer cells (arrowheads) likely corresponds to the *Pvalb*-*Cpne5* type. *Cpne5* is also expressed in other non-*Pvalb* GABAergic and many glutamatergic cells. (j) *Hsd11b1* and *Syt17* are mostly mutually exclusively expressed in L5. (k) *Penk* is expressed in a subset of glutamatergic cells (labelled by pan-glutamatergic marker *Slc17a7*, arrowheads) in L2/3 and in L6, likely corresponding to L2/3-*Ptgs2* and L6a-*Car12* types. *Penk* is also expressed in some GABAergic cells (*Slc17a7*<sup>-</sup> cells, arrows) of *Vip* and *Sst* types. (l) *Col6a1* and *Ddit4l* mRNAs are mutually exclusively expressed in L5b cells. White boxes indicate magnified regions. Scale bars are 200 μm in low-magnification images and 20 μm in high-magnification images. Sequence information for DFISH probes is available in **Supplementary Table 13**. Each image is representative of a single experiment containing at least two independent slides; each slide included at least 2 coronal brain sections containing VISp. Mean RNA-seq expression for each gene in this figure within each transcriptomic cell type is shown in **Supplementary Fig. 12**. To examine gene expression determined by RNA-seq in individual cells within any of the types, refer to the online visualization tool via the Allen Brain Atlas data portal (<http://casestudies.brain-map.org/celltax>).



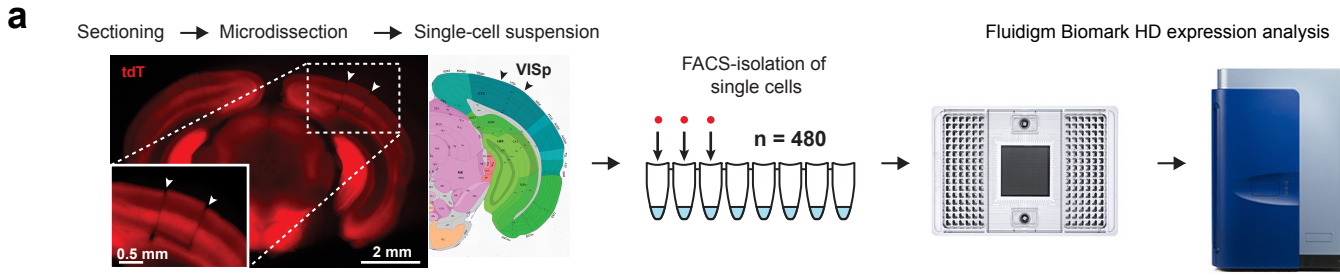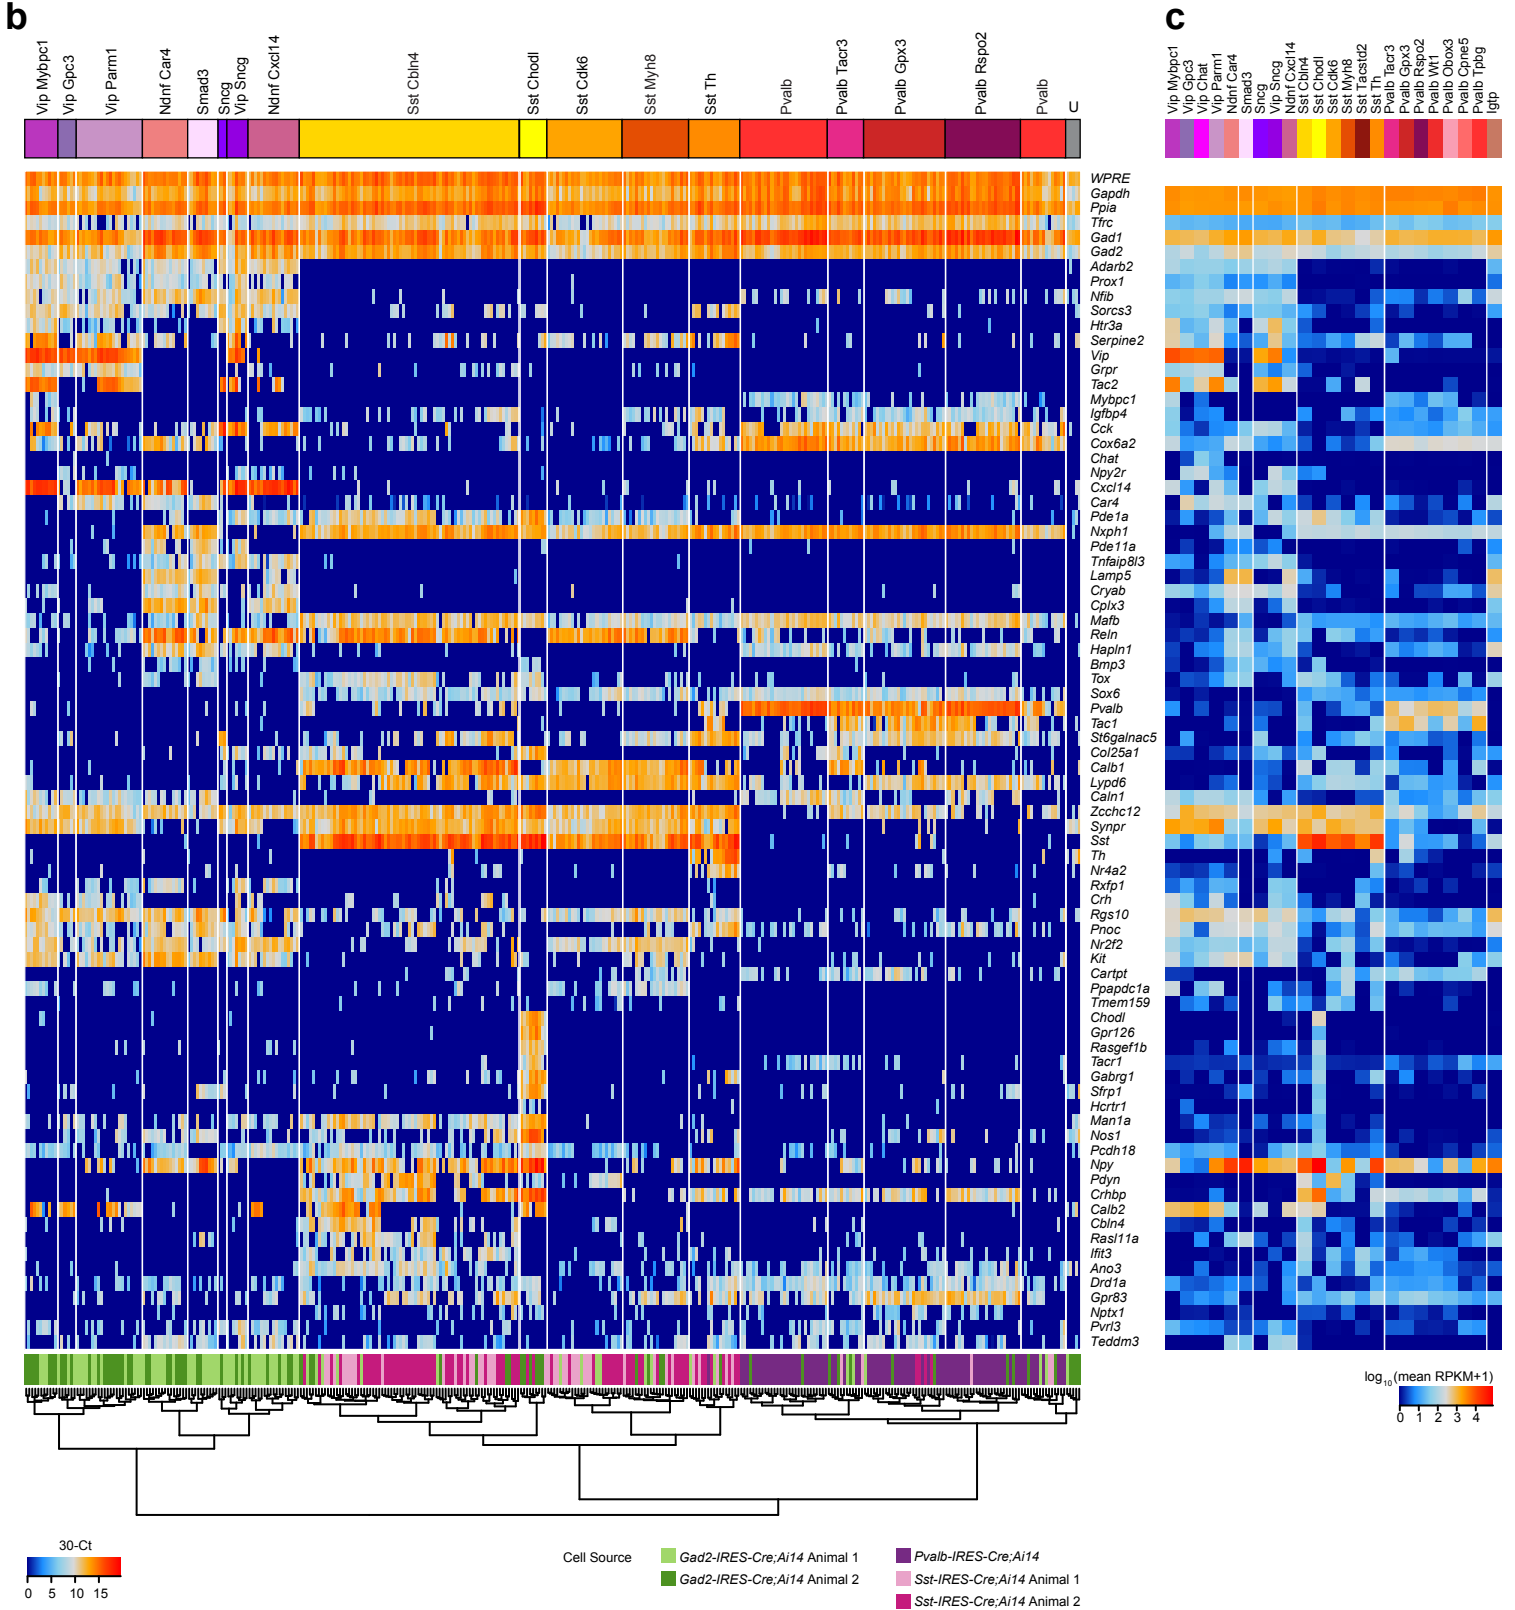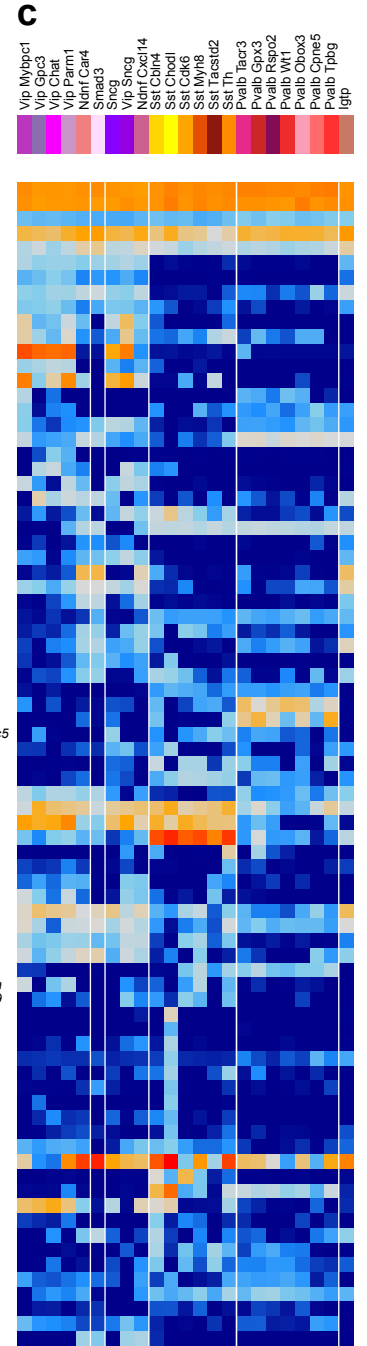

**Supplementary Figure 11. Quantitative RT-PCR confirms coexpression or mutually exclusive expression of marker genes identified by RNA-seq.** (a) Schematic of the workflow for cell isolation and qRT-PCR profiling using the Fluidigm Biomark system. TdT<sup>+</sup> cells were isolated from the *Gad2-IRES-Cre;Ai14* (*N* = 2 animals), *Sst-IRES-Cre;Ai14* (*N* = 2 animals), and *Pvalb-IRES-Cre;Ai14* (*N* = 1 animal) transgenic lines as described in the **Methods**. (b) qRT-PCR expression values (30-Ct; Ct stands for ‘cycle threshold’) for marker genes that discriminate GABAergic types in the RNA-seq data. Single cells (*N* = 480) are represented by individual columns and are grouped by hierarchical clustering of the expression of displayed genes. The color bar above represents putative interneuron identity based on expression of key marker genes; U, unclassified. The color bar below indicates the Cre line and animal from which each individual cell was isolated. Overall, qRT-PCR recapitulates RNA-seq data for key genes that are found to be mutually exclusively expressed or coexpressed in specific subsets of cells. The major GABAergic types (*Vip*, *Ndnf*, *Pvalb*, and *Sst*) are identified according to assays for the corresponding genes, with the exception of the *Ndnf* type, which can be identified by expression of *Lamp5*. Among the *Vip* types, key discriminatory markers include *Tac2*, *Mybp1*, and *Car4*. *Ndnf* types can be distinguished from each other by coexpression of *Cox6a2* and *Car4* or *Npy2r* and *Pde1a*. Similar to *Ndnf* types, *Sncg* and *Vip-Sncg* types are labeled by expression of *Pde1a* and *Tnfrsf8l3*, but they do not express *Lamp5*. The *Smad3* type is identified by coexpression of *Sfrp1* and *Rasl11a*. Coexpression of *Tac1*, *St6galnac5*, *Col25a1*, and *Calb1* is expected in the *Pvalb-Tacr3* type, while *Pvalb-Rspo2* and *Pvalb-Gpx3* types are marked by expression of *Tac1*, *St6galnac5*, and *Lypd6*, but no expression of *Col25a1* and *Calb1*. *Pvalb-Gpx3* can be distinguished from *Pvalb-Rspo2* by more consistent expression of *Zcchc12*. Other *Pvalb* types cannot be clearly distinguished by these assays. Among *Sst* types, *Kit* is only expressed in the *Sst-Myh8* type. The *Sst-Cdk6* type is identified by expression of *Nr2f2* and absence of *Kit*. In accordance with the RNA-seq data for the *Sst-Chodl* transcriptomic type, *Chodl*, *Tacr1*, *Gpr126* and *Gabrg1* are specifically coexpressed. The *Sst-Tacstd2* type cannot not be distinguished based on these assays. The *Sst-Cbln4* type is identified by coexpression of *Cbln4* and *Rasl11a*. *WPRE* is a control probe to determine the expression of *tdTomato-WPRE* mRNA; *WPRE* stands for woodchuck hepatitis virus posttranscriptional regulatory element. *Lamp5* is also known as *6330527O06Rik*. *Teddm3* is also known as *2310042E22Rik*. qRT-PCR primer and probe sequences are listed in **Supplementary Table 14**. (c) Expression of the same genes as in (b) according to RNA-seq data. Each column corresponds to a GABAergic cell type (*N* = 23), with log<sub>10</sub>(mean RPKM+1) plotted for each gene within that type.





**Supplementary Figure 12. Hierarchically organized marker genes.** Marker gene expression (25% trimmed mean RPKM within each type) represented at different levels of cell type taxonomy. Most discriminating genes were selected as described in the **Methods**, and were arranged hierarchically to illustrate a gene code for all 49 cortical cell types. Additional genes from the literature or discovered by the authors were manually added. The marker genes, which were included into the names of cell types are labeled with a colored flag corresponding to that cell type. Unique markers are labeled red, and transcription factor genes are bold and italicized. Many transcription factors listed here have been previously implicated in development, specification or function of specific cell types. For example, *Lhx6*, which is expressed during the development of medial ganglionic eminence-derived GABAergic neurons, is detected in Sst and Pvalb transcriptomic types, as expected, but also shows robust expression in the Igtp GABAergic type. Similarly, *Prox1* is expressed during the development of caudal ganglionic eminence (CGE)-derived GABAergic neurons, and is detected as expected in the Vip and Ndnf transcriptomic types (see also **Supplementary Fig. 11** for confirmation of *Prox1* expression by qRT-PCR). A second reported CGE-derived neuron marker gene, *Nr2f2*, is detected in Vip and Ndnf transcriptomic types, but also shows high expression in three Sst transcriptomic types. *Ndnf* is also known as *A930038C07Rik*; *Lamp5* as *6330527O06Rik*; and *Teddm3* as *2310042E22Rik*.

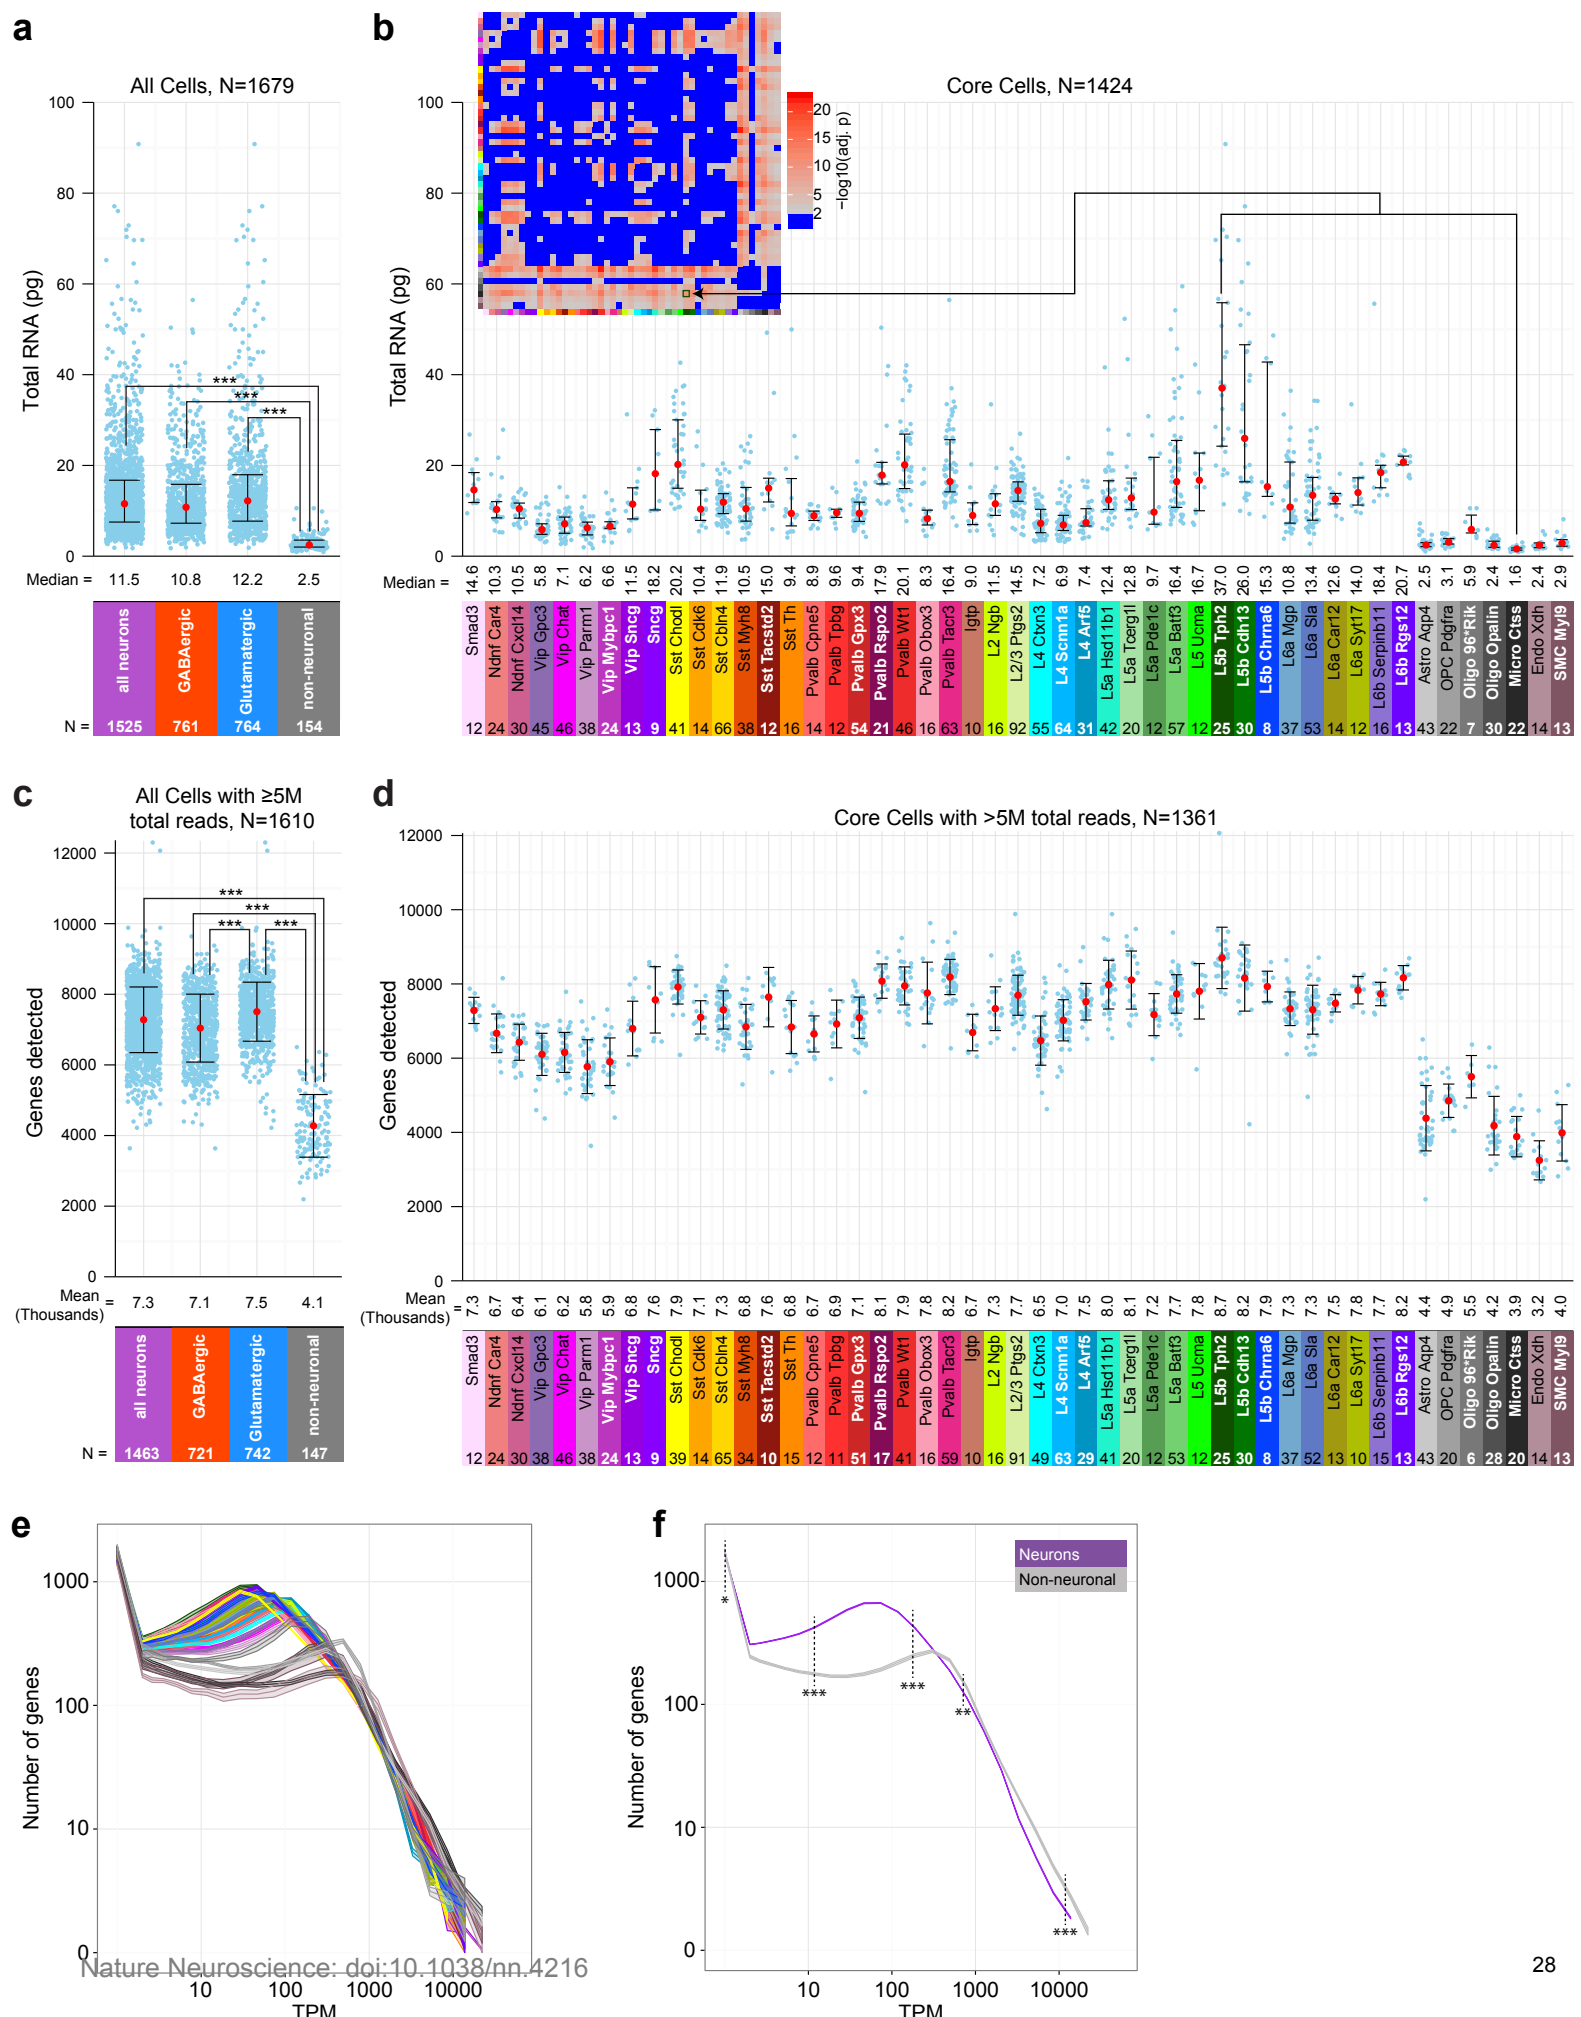

**Supplementary Figure 13. RNA content, gene count and distribution of gene abundances for single cells belonging to different cell types.** (a) Estimation of single cell RNA content based on the ratio of synthetic spike-in ERCC reads and cellular reads (**Methods**) for all cells from major cell classes ( $N = 1525$  for all neurons, 761 for GABAergic neurons, 764 for glutamatergic neurons, and 154 for glia). Red dots represent medians, and whiskers represent 25<sup>th</sup> and 75<sup>th</sup> percentiles. Non-neuronal cells contain significantly less RNA than neurons ( $p = 1.34 \times 10^{-82}$  for comparison to all neurons,  $p = 7.03 \times 10^{-75}$  for comparison to all GABAergic neurons, and  $p = 1.49 \times 10^{-76}$  for comparison to all glutamatergic neurons; Mann-Whitney test with Bonferroni correction, the corresponding degrees of freedom are: 1677, 913, and 916). \*\*\*  $p < 10^{-30}$ . (b) Same as (a) but for all cell types using only core cells (number listed at the bottom of the corresponding colored label; total  $N = 1424$ ). The inset heatmap shows p-values for all pairwise Mann-Whitney tests with Bonferroni correction. The highlighted position in the heatmap corresponds to highly significant difference in RNA content between L5b-Tph2 cell type and microglia. (c) Average numbers of genes detected (read counts  $\geq 1$ , values at bottom) across major classes. For this analysis, all single cell sequencing results were subsampled to 5 million total reads (69 cells that have total read depth lower than 5 million reads were excluded leaving 1610 total cells). Red dots represent means, and error bars represent standard deviation. We detect significantly fewer genes in non-neuronal cells than in neurons ( $p = 8.09 \times 10^{-89}$  for comparison to all neurons,  $p = 4.14 \times 10^{-89}$  for comparison to all GABAergic neurons, and  $p = 3.02 \times 10^{-98}$  for comparison to all glutamatergic neurons; t-test with unequal variances and Bonferroni correction, the corresponding degrees of freedom are: 1608, 866, and 887). We also detect significantly more genes in glutamatergic than in GABAergic neurons ( $p = 1.80 \times 10^{-21}$ , t-test with unequal variances and Bonferroni correction, 1461 degrees of freedom). \*\*\*  $p < 10^{-30}$ . The use of the t-test is justified by the approximately normal distribution of the genes detected within samples of a given group. (d) Same as (c), but for all cell types using only core cells (number listed at the bottom of the corresponding colored label; total  $N = 1361$ ). (e) The distributions of transcripts per million (TPM) for all genes in each of the 49 transcriptomic cell types; number of core cells for each type is listed in (b). Each central line designates the mean, and each shaded region surrounding it indicates SEM. Line colors correspond to cluster colors used in (b) and (d). (f) Same as (e) but for all cells belonging to neuronal types ( $N = 1525$ ) versus all non-neuronal cells ( $N = 154$ ). Compared to neurons, non-neuronal cells exhibit significantly fewer transcripts at low and intermediate abundance, and more transcripts at high abundance. (From left to right, starred p-values are 0.018,  $2.7 \times 10^{-86}$ ,  $1.5 \times 10^{-83}$ ,  $3.0 \times 10^{-5}$ , and  $2.1 \times 10^{-14}$ , \*  $p < 0.05$ , \*\*  $p < 0.001$ , \*\*\*  $p < 10^{-5}$ , Mann-Whitney test with Bonferroni correction, 1677 degrees of freedom). Note that it is possible that gene abundance distributions may change in the future as more complete mapping to transcriptome for all types is achieved due to better genome annotation.

# Ion Channels

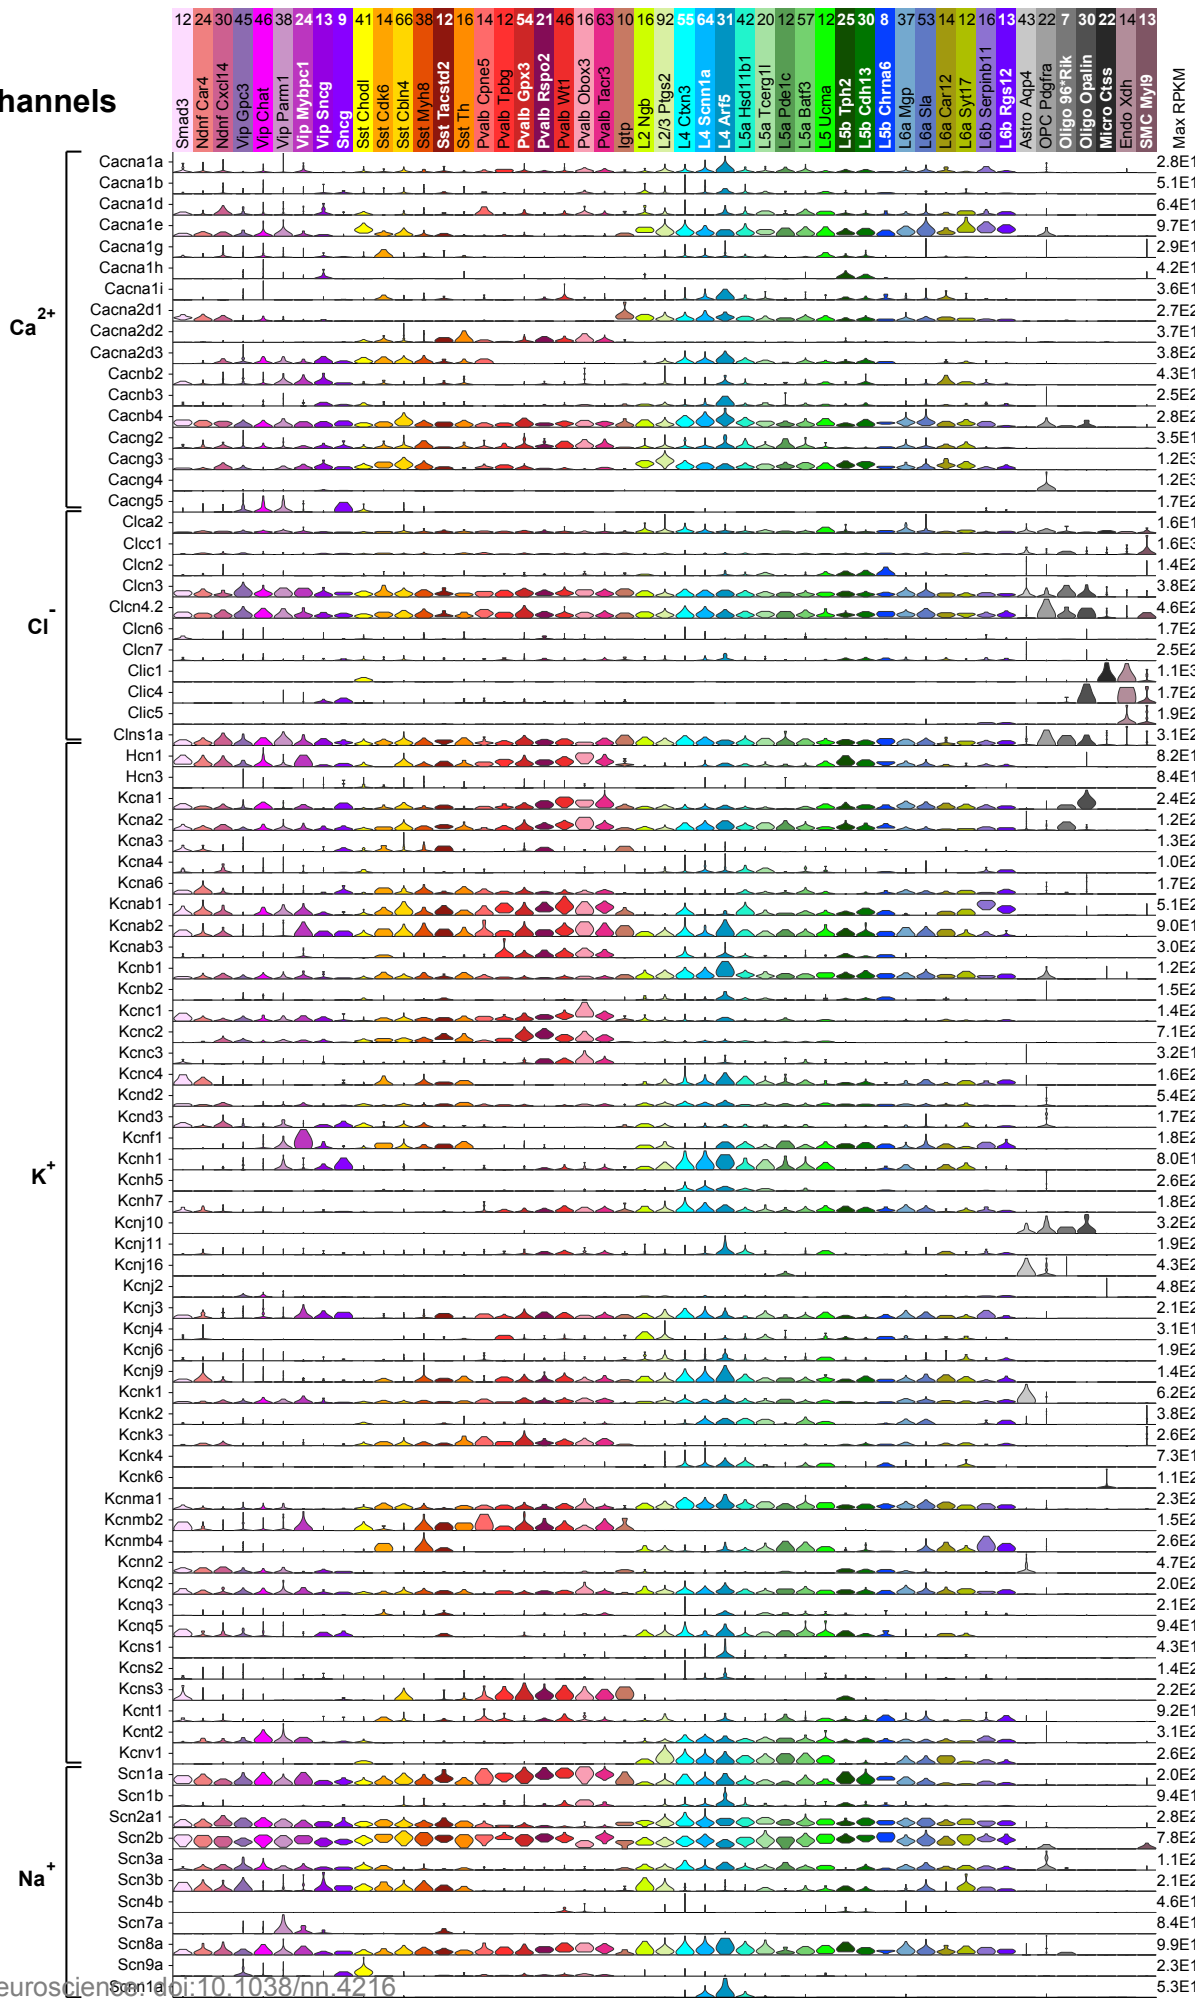

**Supplementary Figure 14. Expression of ion channels in cell types.** Violin plots represent the gene expression distributions (rows) among single cells within each of the 49 transcriptomic cell types (columns). Only core cells are used ( $N = 1424$ ). Expression is on a linear scale and is normalized to the maximum single cell expression value (listed on the right). The following ion channel genes are not shown here due to absent, extremely low or sparse expression: *Cacna1f*, *Cacna1s*, *Cacna2d4*, *Cacnb1*, *Cacng1*, *Cacng6*, *Cacng7*, *Cacng8*, *Clca1*, *Clca3*, *Clca4*, *Clca5*, *Clca6*, *Clcn1*, *Clcn5*, *Clcnka*, *Clcnkb*, *Clic3*, *Clic6*, *Hcn2*, *Hcn4*, *Kcna5*, *Kcna7*, *Kcna10*, *Kcnd1*, *Kcne1*, *Kcne2*, *Kcne3*, *Kcne4*, *Kcng1*, *Kcng2*, *Kcng3*, *Kcng4*, *Kcnh2*, *Kcnh3*, *Kcnh4*, *Kcnh6*, *Kcnh8*, *Kcnj1*, *Kcnj12*, *Kcnj13*, *Kcnj14*, *Kcnj15*, *Kcnj5*, *Kcnj8*, *Kcnk5*, *Kcnk7*, *Kcnk9*, *Kcnk10*, *Kcnk12*, *Kcnk13*, *Kcnk15*, *Kcnk16*, *Kcnk18*, *Kcnmb1*, *Kcnmb3*, *Kcnn1*, *Kcnn3*, *Kcnn4*, *Kcnq1*, *Kcnq4*, *Kcnv2*, *Scn10a*, *Scn11a*, *Scn4a*, *Scn5a*, *Scnn1b*, *Scnn1g*.

# Neurotransmitter Receptors

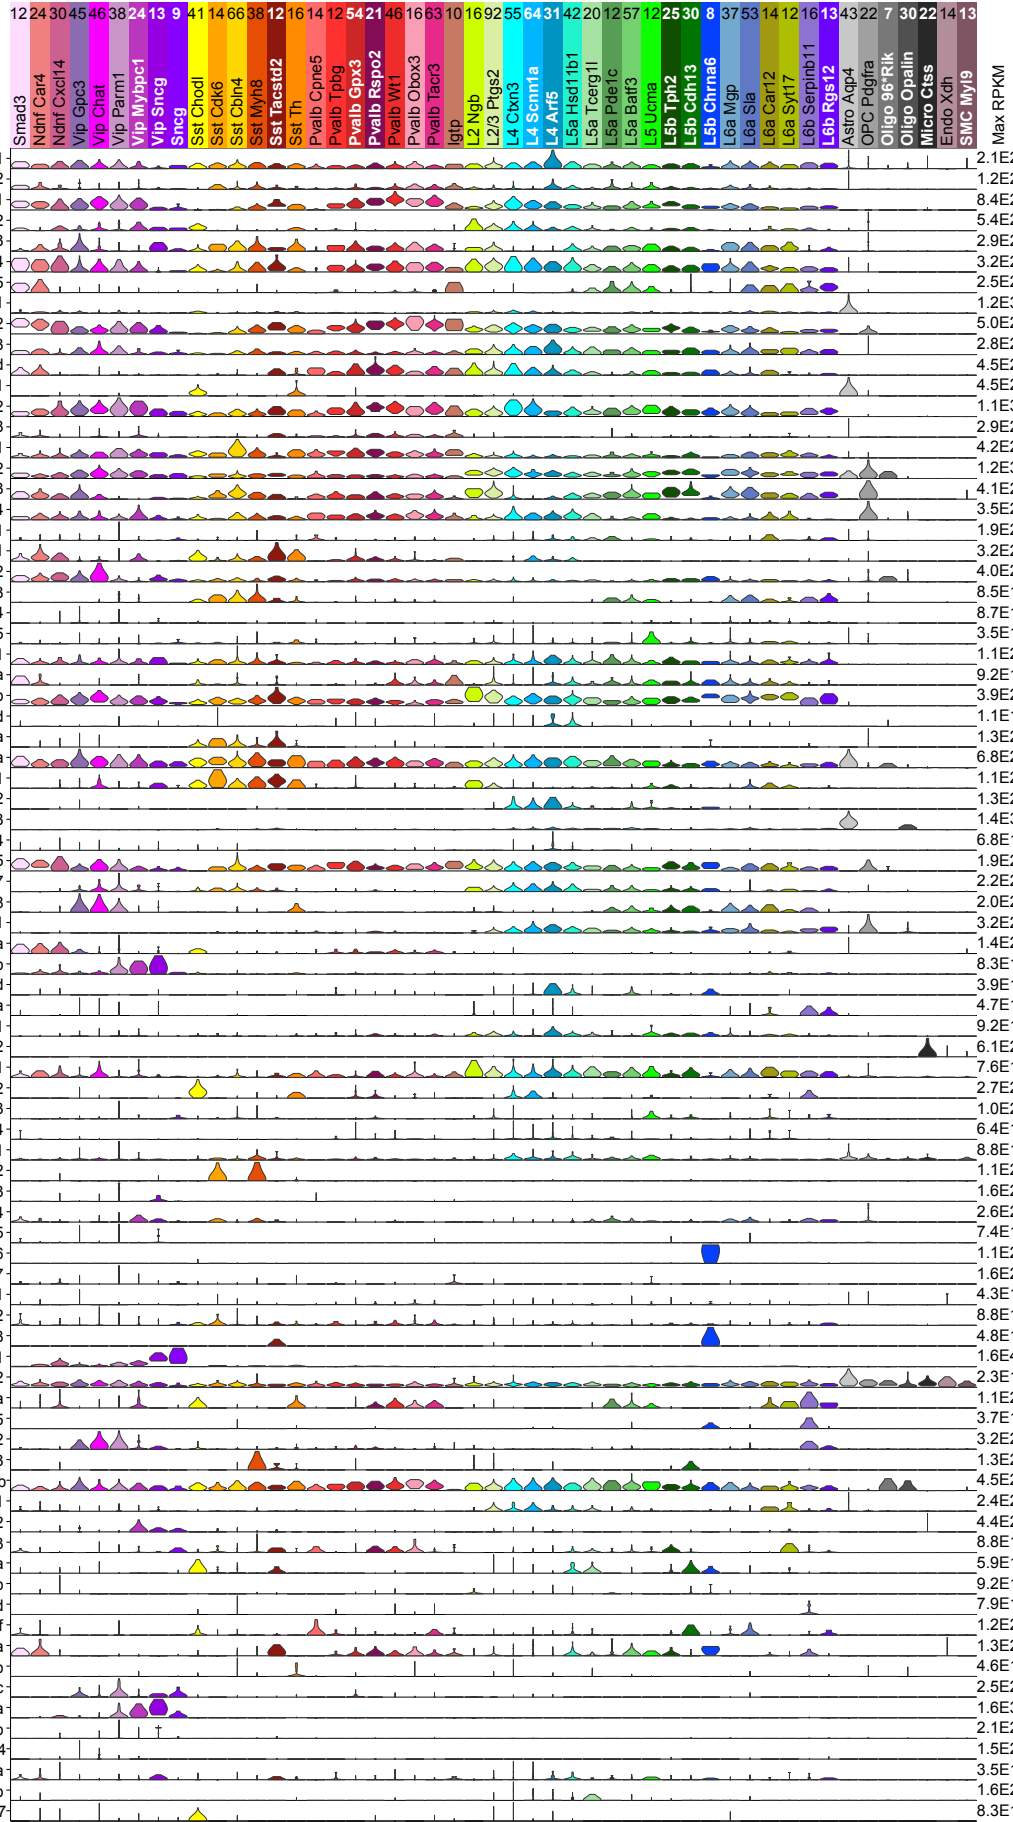

**Supplementary Figure 15. Expression of neurotransmitter receptors in cell types.** Violin plots represent the gene expression distributions (rows) among single cells within each of the 49 transcriptomic cell types (columns). Only core cells are used ( $N = 1424$ ). Expression is on a linear scale and is normalized to the maximum single cell expression value (listed on the right). The following receptor genes are not shown here due to absent, extremely low or sparse expression: *Gabra6*, *Gabre*, *Gabrp*, *Gabrq*, *Gabrr1*, *Gabrr2*, *Gabrr3*, *Grid2*, *Grin3b*, *Grm6*, *Adora2a*, *Adora2b*, *Adora3*, *Adra2b*, *Adra2c*, *Adrb3*, *Chrm5*, *Chrna9*, *Chrna10*, *Chrnb4*, *Chrnd*, *Chrne*, *Chrng*, *Drd2*, *Drd3*, *Drd4*, *Glr1*, *Glr4*, *Grin2c*, *Hrh4*, *Htr6*.





**Supplementary Figure 16. Expression of neuropeptides and their receptors in cell types.**

Violin plots represent the gene expression distributions (rows) among single cells within each of the 49 transcriptomic cell types (columns). Only core cells are used ( $N = 1424$ ). Expression is on a linear scale and is normalized to the maximum single cell expression value (listed on the right). Each neuropeptide and its receptors are grouped together in like colors, and each set alternates between red and blue. The following receptor genes are not shown here due to absent, extremely low or sparse expression: *Rxfp2*, *Rxfp4*, *Sstr5*.

**a**

| mean number of genes detected<br>cell number | Zeisel et al. |            |             |
|----------------------------------------------|---------------|------------|-------------|
|                                              | This study    | Neocortex  | Hippocampus |
| GABAergic neurons                            | 761 7,042     | 164 4,650  | 175 4,911   |
| Glutamatergic neurons                        | 764 7,507     | 399 4,543  | 939* 4,909  |
| Non-neuronal cells                           | 154 4,274     | 1128 2,494 | 249 2,645   |

\*Not used for the comparison

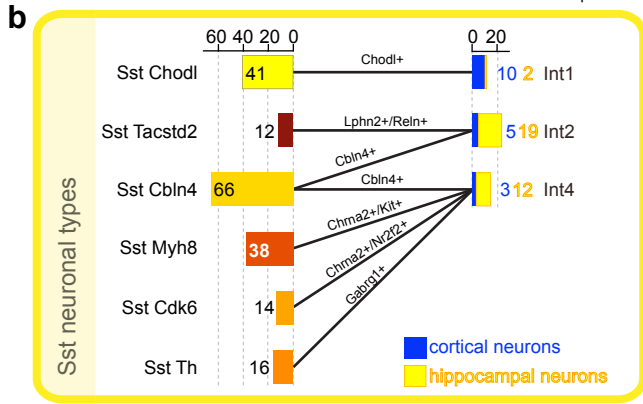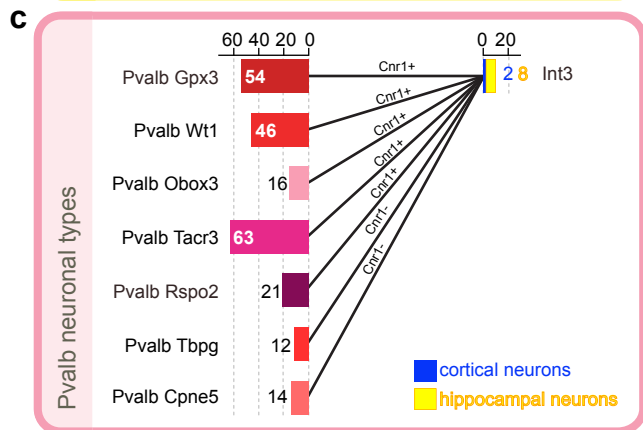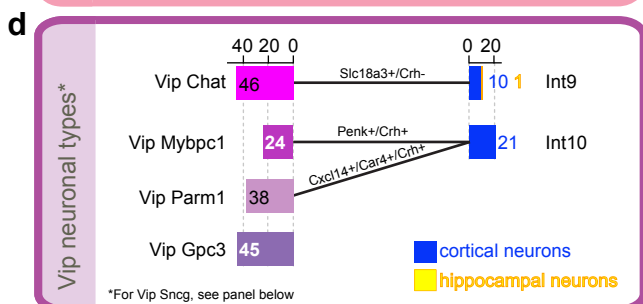

\*For Vip Sncg, see panel below

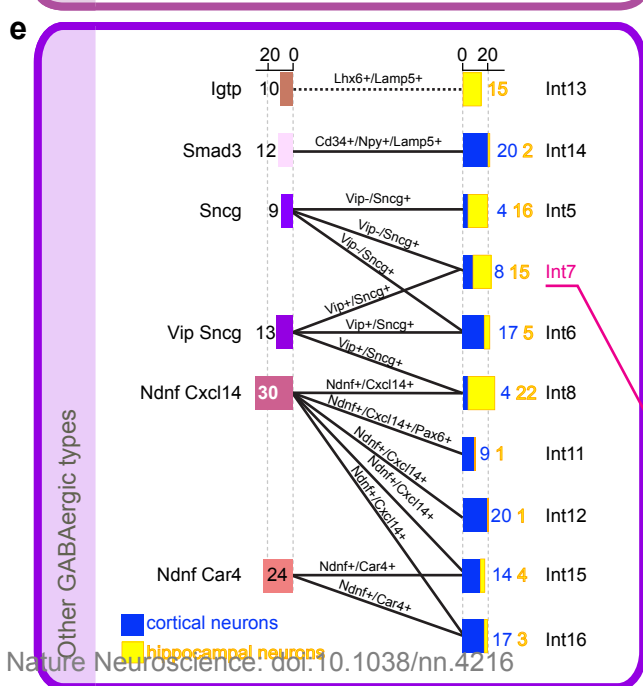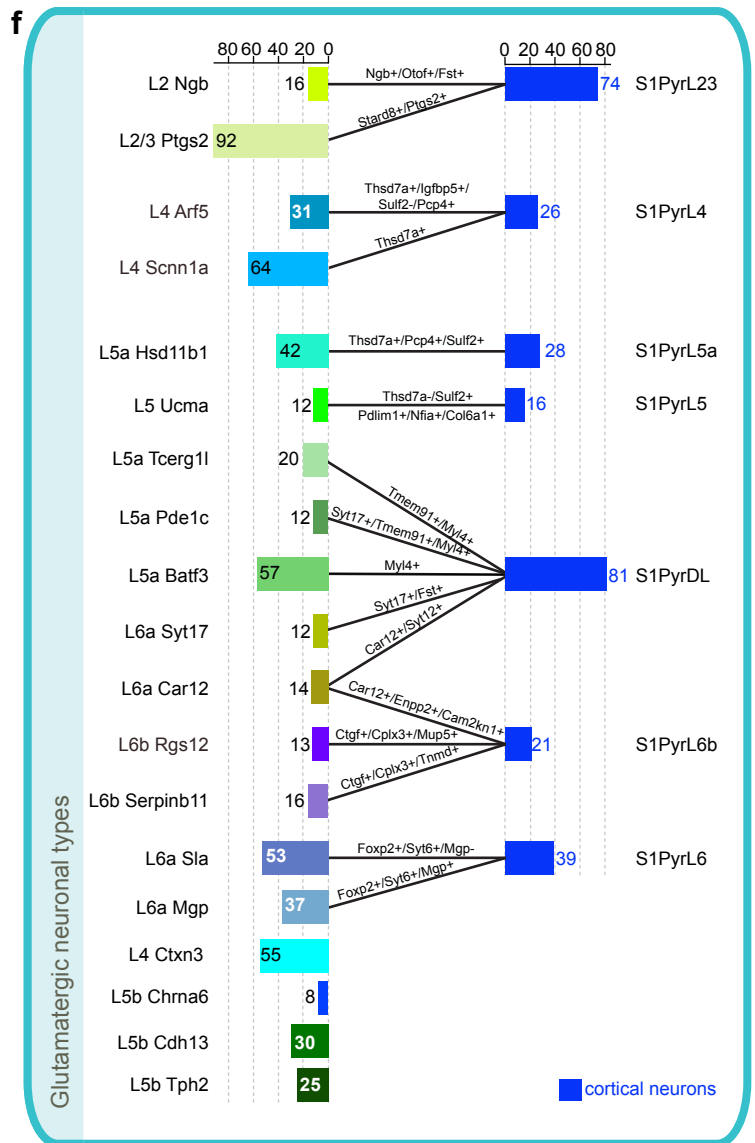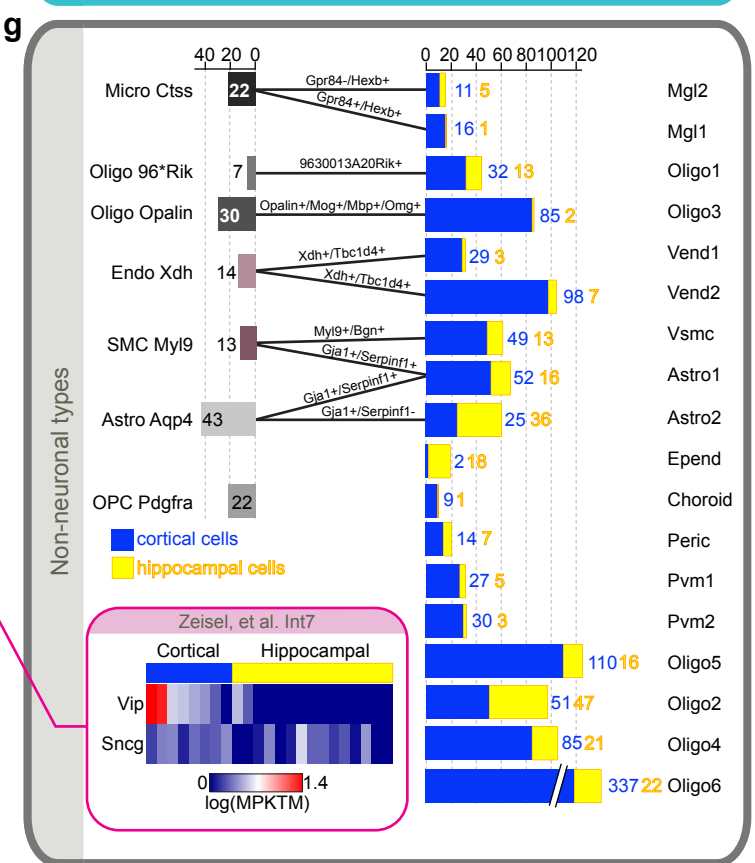

**Supplementary Figure 17. Comparison of cell types defined in our study and Zeisel *et al.*<sup>16</sup>**

**(a)** Summary statistics for cell sampling and gene detection. Compared to the Zeisel *et al.* study, we sampled more cortical neurons and sequenced the individual cells more deeply to detect more genes. Many of those genes are not highly expressed, and are therefore not detected by Zeisel *et al.* Therefore, we used only the genes reported by Zeisel *et al.* to determine cell type correspondences. When performing clustering, Zeisel *et al.* combined the GABAergic neurons and non-neuronal cells from both hippocampus and cortex, but separated the glutamatergic cells based on region of origin. We therefore retained this grouping of GABAergic cells from the Zeisel *et al.* study, but did not analyze the glutamatergic hippocampal cells. **(b-e)** Comparison of GABAergic neurons based on marker genes. Due to the low sampling of Sst and Pvalb types in the Zeisel *et al.* dataset, the only clear correspondence among these types is between our Sst-Chodl type and *Int1* Zeisel *et al.* type (b). For Vip types, the clearest correspondence is between Vip-Chat and *Int9* (d). For other GABAergic types, the correspondences are less clear, and sometimes unexpected. For example, our Igtp type appears to correspond to *Int13* type, which we connect using a dotted line because *Int13* comprises hippocampal cells only (e). Correspondence is sometimes complicated by differences in marker gene expression in cortical vs. hippocampal cells. For example, *Int7* shows marked differences in the prevalence of the marker gene *Vip* between cells from different regions (inset). MPKTM, molecules per thousand total molecules detected. **(f)** We identified 21 glutamatergic types, most of which correspond to subdivisions of the L2/3, L4, L6, and deep-layer types from Zeisel *et al.* However, we also identified distinct types that appear to have no equivalent in the Zeisel *et al.* study: L4-Ctxn3, L5-Chrna6, L5b-Cdh13, and L5b-Tph2. We find that the latter two types contain the largest amount of RNA (**Supplementary Fig. 13**), and are probably the largest cells overall. This characteristic may have prevented their capture on Fluidigm C1 arrays employed by Zeisel *et al.* **(g)** Zeisel *et al.* identified many more non-neuronal types (18 vs. 7 in our case), but no oligodendrocyte precursor cells (OPCs), which are present in our study.
